# Supplementary material for: RopB protein of Rhizobium leguminosarum bv. viciae adopts amyloid state during symbiotic interactions with pea (Pisum sativum L.)
Source: Front Plant Sci. 2022 Oct 24;13:1014699. doi: 10.3389/fpls.2022.1014699 (PMC9650718; doi:10.3389/fpls.2022.1014699)
Supplement: Supplementary file 2 [file DataSheet_2.xlsx]

## Sheet: GO Rhizobium (Fix+)
Supplementary Table 2. The underlying data on annotation of identified proteins with GO terms
UniProt ID	Gene Ontology: Biological process	Gene Ontology: Molecular function	Gene Ontology: Cellular component
A9CHH2	SRP-dependent cotranslational protein targeting to membrane [GO:0006614]	GTP binding [GO:0005525]; GTPase activity [GO:0003924]	cytoplasm [GO:0005737]; intrinsic component of plasma membrane [GO:0031226]
B3PPT3	translation [GO:0006412]	rRNA binding [GO:0019843]; structural constituent of ribosome [GO:0003735]	small ribosomal subunit [GO:0015935]
B3PRH7	aromatic amino acid family biosynthetic process [GO:0009073]; cellular amino acid biosynthetic process [GO:0008652]; chorismate biosynthetic process [GO:0009423]	3-phosphoshikimate 1-carboxyvinyltransferase activity [GO:0003866]	cytoplasm [GO:0005737]
B3PSA1	pyridoxine biosynthetic process [GO:0008615]	FMN binding [GO:0010181]; pyridoxamine-phosphate oxidase activity [GO:0004733]	NA
B3PVW3	translation [GO:0006412]	structural constituent of ribosome [GO:0003735]	ribosome [GO:0005840]
B3PWI6	proteolysis involved in cellular protein catabolic process [GO:0051603]	metal ion binding [GO:0046872]; threonine-type endopeptidase activity [GO:0004298]	HslUV protease complex [GO:0009376]; proteasome core complex [GO:0005839]
B3PWT4	translation [GO:0006412]	rRNA binding [GO:0019843]; structural constituent of ribosome [GO:0003735]	ribosome [GO:0005840]
B3PXD7	mRNA catabolic process [GO:0006402]; RNA processing [GO:0006396]	magnesium ion binding [GO:0000287]; polyribonucleotide nucleotidyltransferase activity [GO:0004654]; RNA binding [GO:0003723]	cytoplasm [GO:0005737]
B3PXY7	aromatic amino acid family biosynthetic process [GO:0009073]; cellular amino acid biosynthetic process [GO:0008652]; chorismate biosynthetic process [GO:0009423]	3-dehydroquinate dehydratase activity [GO:0003855]	NA
B3PYS0	protein lipoylation [GO:0009249]	4 iron, 4 sulfur cluster binding [GO:0051539]; lipoate synthase activity [GO:0016992]; lipoyl synthase activity (acting on glycine-cleavage complex H protein [GO:0102552]; lipoyl synthase activity (acting on pyruvate dehydrogenase E2 protein) [GO:0102553]; metal ion binding [GO:0046872]	cytoplasm [GO:0005737]
B5ZMF2	arginyl-tRNA aminoacylation [GO:0006420]	arginine-tRNA ligase activity [GO:0004814]; ATP binding [GO:0005524]	cytoplasm [GO:0005737]
B5ZMF7	protein transport by the Tat complex [GO:0043953]	protein transmembrane transporter activity [GO:0008320]	integral component of plasma membrane [GO:0005887]; TAT protein transport complex [GO:0033281]
B5ZMI9	regulation of translational fidelity [GO:0006450]; translation [GO:0006412]	asparaginyl-tRNA synthase (glutamine-hydrolyzing) activity [GO:0050566]; ATP binding [GO:0005524]; glutaminyl-tRNA synthase (glutamine-hydrolyzing) activity [GO:0050567]	NA
B5ZMJ0	translation [GO:0006412]	ATP binding [GO:0005524]; glutaminyl-tRNA synthase (glutamine-hydrolyzing) activity [GO:0050567]	glutamyl-tRNA(Gln) amidotransferase complex [GO:0030956]
B5ZMS8	'de novo' AMP biosynthetic process [GO:0044208]	adenylosuccinate synthase activity [GO:0004019]; GTP binding [GO:0005525]; magnesium ion binding [GO:0000287]	cytoplasm [GO:0005737]
B5ZMX7	lipoprotein biosynthetic process [GO:0042158]	N-acyltransferase activity [GO:0016410]	integral component of membrane [GO:0016021]; plasma membrane [GO:0005886]
B5ZN21	tRNA pseudouridine synthesis [GO:0031119]	RNA binding [GO:0003723]; tRNA pseudouridine synthase activity [GO:0106029]	NA
B5ZN83	translation [GO:0006412]	structural constituent of ribosome [GO:0003735]	small ribosomal subunit [GO:0015935]
B5ZN84	NA	translation elongation factor activity [GO:0003746]	cytoplasm [GO:0005737]
B5ZQY2	carbohydrate metabolic process [GO:0005975]; pentose-phosphate shunt [GO:0006098]	transaldolase activity [GO:0004801]	cytoplasm [GO:0005737]
B5ZRD6	protein refolding [GO:0042026]	ATP binding [GO:0005524]; ATP hydrolysis activity [GO:0016887]; isomerase activity [GO:0016853]; unfolded protein binding [GO:0051082]	cytoplasm [GO:0005737]
B5ZRX6	translation [GO:0006412]	structural constituent of ribosome [GO:0003735]	ribosome [GO:0005840]
B5ZSN9	NA	ATP binding [GO:0005524]; proton-transporting ATP synthase activity, rotational mechanism [GO:0046933]; proton-transporting ATPase activity, rotational mechanism [GO:0046961]	plasma membrane [GO:0005886]; proton-transporting ATP synthase complex, catalytic core F(1) [GO:0045261]
B5ZSP0	NA	proton-transporting ATP synthase activity, rotational mechanism [GO:0046933]	plasma membrane [GO:0005886]; proton-transporting ATP synthase complex, catalytic core F(1) [GO:0045261]
B5ZSR9	tricarboxylic acid cycle [GO:0006099]	ATP binding [GO:0005524]; magnesium ion binding [GO:0000287]; succinate-CoA ligase (ADP-forming) activity [GO:0004775]	NA
B5ZUA0	isopentenyl diphosphate biosynthetic process, methylerythritol 4-phosphate pathway [GO:0019288]; terpenoid biosynthetic process [GO:0016114]	4 iron, 4 sulfur cluster binding [GO:0051539]; 4-hydroxy-3-methylbut-2-en-1-yl diphosphate synthase activity [GO:0046429]; iron ion binding [GO:0005506]	NA
B5ZUD9	translation [GO:0006412]	structural constituent of ribosome [GO:0003735]	ribosome [GO:0005840]
B5ZV36	acetyl-CoA biosynthetic process from acetate [GO:0019427]	acetate-CoA ligase activity [GO:0003987]; AMP binding [GO:0016208]; ATP binding [GO:0005524]; metal ion binding [GO:0046872]	NA
B5ZXA0	NA	NA	NA
B5ZXR7	NA	translation initiation factor activity [GO:0003743]	cytoplasm [GO:0005737]
B5ZYL1	translation [GO:0006412]	rRNA binding [GO:0019843]; structural constituent of ribosome [GO:0003735]	ribosome [GO:0005840]
B5ZYT0	translation [GO:0006412]	rRNA binding [GO:0019843]; structural constituent of ribosome [GO:0003735]; tRNA binding [GO:0000049]	small ribosomal subunit [GO:0015935]
B5ZYT6	translation [GO:0006412]	rRNA binding [GO:0019843]; structural constituent of ribosome [GO:0003735]	ribosome [GO:0005840]
B5ZYU2	translation [GO:0006412]	rRNA binding [GO:0019843]; structural constituent of ribosome [GO:0003735]; tRNA binding [GO:0000049]	ribosome [GO:0005840]
B5ZYV0	translation [GO:0006412]	rRNA binding [GO:0019843]; structural constituent of ribosome [GO:0003735]	ribosome [GO:0005840]
B5ZYV2	translation [GO:0006412]	rRNA binding [GO:0019843]; structural constituent of ribosome [GO:0003735]	small ribosomal subunit [GO:0015935]
B5ZYX3	ribosome biogenesis [GO:0042254]	GTP binding [GO:0005525]	NA
B5ZZ34	arabinose catabolic process [GO:0019568]	2 iron, 2 sulfur cluster binding [GO:0051537]; D-fuconate dehydratase activity [GO:0047818]; galactonate dehydratase activity [GO:0008869]; L-arabinonate dehydratase activity [GO:0050020]; metal ion binding [GO:0046872]	NA
B9JDC0	histidine catabolic process to glutamate and formamide [GO:0019556]; histidine catabolic process to glutamate and formate [GO:0019557]	histidine ammonia-lyase activity [GO:0004397]	cytoplasm [GO:0005737]
B9JDR8	regulation of translation [GO:0006417]; translation [GO:0006412]	rRNA binding [GO:0019843]; structural constituent of ribosome [GO:0003735]; tRNA binding [GO:0000049]	large ribosomal subunit [GO:0015934]
B9JMX8	thiamine diphosphate biosynthetic process [GO:0009229]	thiazole synthase activity [GO:1990107]	cytoplasm [GO:0005737]
B9JN19	carbohydrate metabolic process [GO:0005975]	isomerase activity [GO:0016853]	NA
O05940	cell redox homeostasis [GO:0045454]; glycolytic process [GO:0006096]	dihydrolipoyl dehydrogenase activity [GO:0004148]; flavin adenine dinucleotide binding [GO:0050660]	cytoplasm [GO:0005737]
O30807	malate metabolic process [GO:0006108]	acyltransferase activity [GO:0016746]; malate dehydrogenase (decarboxylating) (NAD+) activity [GO:0004471]; metal ion binding [GO:0046872]; NAD binding [GO:0051287]	NA
O30808	malate metabolic process [GO:0006108]	acyltransferase activity [GO:0016746]; malate dehydrogenase (decarboxylating) (NAD+) activity [GO:0004471]; malate dehydrogenase (decarboxylating) (NADP+) activity [GO:0004473]; metal ion binding [GO:0046872]; NAD binding [GO:0051287]; oxaloacetate decarboxylase activity [GO:0008948]	NA
O33525	carboxylic acid metabolic process [GO:0019752]; tricarboxylic acid cycle [GO:0006099]	L-malate dehydrogenase activity [GO:0030060]	NA
O33533	nitrogen fixation [GO:0009399]	ATP binding [GO:0005524]; ATP hydrolysis activity [GO:0016887]; ATPase-coupled cation transmembrane transporter activity [GO:0019829]; metal ion binding [GO:0046872]	integral component of membrane [GO:0016021]; plasma membrane [GO:0005886]
O33915	tricarboxylic acid cycle [GO:0006099]	citrate (Si)-synthase activity [GO:0004108]	cytoplasm [GO:0005737]
O54068	capsule polysaccharide biosynthetic process [GO:0045227]; UDP-glucuronate biosynthetic process [GO:0006065]	NAD binding [GO:0051287]; UDP-glucose 6-dehydrogenase activity [GO:0003979]	NA
O68547	lipopolysaccharide core region biosynthetic process [GO:0009244]	glycosyltransferase activity [GO:0016757]	NA
O68965	NA	inositol 2-dehydrogenase activity [GO:0050112]; nucleotide binding [GO:0000166]	NA
O69177	cellular response to heat [GO:0034605]; protein quality control for misfolded or incompletely synthesized proteins [GO:0006515]	ATP binding [GO:0005524]; ATP hydrolysis activity [GO:0016887]; ATP-dependent peptidase activity [GO:0004176]; sequence-specific DNA binding [GO:0043565]; serine-type endopeptidase activity [GO:0004252]	cytoplasm [GO:0005737]
O86459	biosynthetic process [GO:0009058]	glutamate-prephenate aminotransferase activity [GO:0033854]; L-aspartate:2-oxoglutarate aminotransferase activity [GO:0004069]; pyridoxal phosphate binding [GO:0030170]	cytoplasm [GO:0005737]
O87392	glutamate biosynthetic process [GO:0006537]	glutamate synthase activity [GO:0015930]	NA
P00461	nitrogen fixation [GO:0009399]	4 iron, 4 sulfur cluster binding [GO:0051539]; ATP binding [GO:0005524]; carbonyl sulfide nitrogenase activity [GO:0018697]; metal ion binding [GO:0046872]; nitrogenase activity [GO:0016163]	NA
P02348	chromosome condensation [GO:0030261]	DNA binding [GO:0003677]	NA
P07748	nitrogen fixation [GO:0009399]	4 iron, 4 sulfur cluster binding [GO:0051539]; lyase activity [GO:0016829]; metal ion binding [GO:0046872]	NA
P09821	nitrogen fixation [GO:0009399]	oxidoreductase activity [GO:0016491]	NA
P09825	nitrogen fixation [GO:0009399]	4 iron, 4 sulfur cluster binding [GO:0051539]; lyase activity [GO:0016829]; metal ion binding [GO:0046872]	NA
P09826	glutamine biosynthetic process [GO:0006542]; nitrogen fixation [GO:0009399]	ATP binding [GO:0005524]; glutamate-ammonia ligase activity [GO:0004356]; metal ion binding [GO:0046872]	cytoplasm [GO:0005737]
P09828	nitrogen fixation [GO:0009399]; phosphorelay signal transduction system [GO:0000160]	ATP binding [GO:0005524]; DNA-binding transcription factor activity [GO:0003700]; metal ion binding [GO:0046872]; sequence-specific DNA binding [GO:0043565]	NA
P10577	nitrogen fixation [GO:0009399]; regulation of nitrogen utilization [GO:0006808]; regulation of transcription, DNA-templated [GO:0006355]	ATP binding [GO:0005524]; phosphorelay response regulator activity [GO:0000156]; sequence-specific DNA binding [GO:0043565]	cytoplasm [GO:0005737]
P12622	negative regulation of translational elongation [GO:0045900]	ATP binding [GO:0005524]	NA
P14129	translation [GO:0006412]	RNA binding [GO:0003723]; structural constituent of ribosome [GO:0003735]	ribosome [GO:0005840]
P15395	glutamine metabolic process [GO:0006541]; tryptophan biosynthetic process [GO:0000162]	anthranilate synthase activity [GO:0004049]	NA
P18396	nitrogen fixation [GO:0009399]	4 iron, 4 sulfur cluster binding [GO:0051539]; metal ion binding [GO:0046872]	integral component of membrane [GO:0016021]; plasma membrane [GO:0005886]
P19066	nitrogen fixation [GO:0009399]	ATP binding [GO:0005524]; carbonyl sulfide nitrogenase activity [GO:0018697]; iron-sulfur cluster binding [GO:0051536]; metal ion binding [GO:0046872]; nitrogenase activity [GO:0016163]	molybdenum-iron nitrogenase complex [GO:0016612]
P19067	nitrogen fixation [GO:0009399]	ATP binding [GO:0005524]; carbonyl sulfide nitrogenase activity [GO:0018697]; iron-sulfur cluster binding [GO:0051536]; metal ion binding [GO:0046872]; nitrogenase activity [GO:0016163]	molybdenum-iron nitrogenase complex [GO:0016612]
P20471	carbohydrate metabolic process [GO:0005975]	carbohydrate binding [GO:0030246]; glycosyltransferase activity [GO:0016757]	integral component of membrane [GO:0016021]; plasma membrane [GO:0005886]
P23716	NA	NA	periplasmic space [GO:0042597]
P29937	cobalamin biosynthetic process [GO:0009236]; porphyrin-containing compound biosynthetic process [GO:0006779]	ATP binding [GO:0005524]	NA
P30327	division septum assembly [GO:0000917]; FtsZ-dependent cytokinesis [GO:0043093]; protein polymerization [GO:0051258]	GTP binding [GO:0005525]; GTPase activity [GO:0003924]	cell division site [GO:0032153]; cytoplasm [GO:0005737]
P49989	DNA-templated transcription, initiation [GO:0006352]; nitrogen fixation [GO:0009399]	DNA binding [GO:0003677]; DNA-binding transcription activator activity [GO:0001216]; DNA-directed 5'-3' RNA polymerase activity [GO:0003899]; sigma factor activity [GO:0016987]	NA
P50174	poly-hydroxybutyrate biosynthetic process [GO:0042619]	acetyl-CoA C-acetyltransferase activity [GO:0003985]	cytoplasm [GO:0005737]
P50350	phosphorelay signal transduction system [GO:0000160]; polysaccharide biosynthetic process [GO:0000271]; positive regulation of transcription, DNA-templated [GO:0045893]	DNA-binding transcription activator activity [GO:0001216]; metal ion binding [GO:0046872]; transcription cis-regulatory region binding [GO:0000976]	cytoplasm [GO:0005737]; protein-DNA complex [GO:0032993]
P50507	DNA-templated transcription, initiation [GO:0006352]; response to heat [GO:0009408]	DNA binding [GO:0003677]; sigma factor activity [GO:0016987]	cytoplasm [GO:0005737]
P55353	'de novo' GDP-L-fucose biosynthetic process [GO:0042351]	GDP-L-fucose synthase activity [GO:0050577]; isomerase activity [GO:0016853]; NADP+ binding [GO:0070401]	NA
P55653	gamma-aminobutyric acid catabolic process [GO:0009450]	succinate-semialdehyde dehydrogenase (NADP+) activity [GO:0036243]	NA
P56893	hydrogen sulfide biosynthetic process [GO:0070814]; sulfate assimilation [GO:0000103]	ATP binding [GO:0005524]; GTP binding [GO:0005525]; GTPase activity [GO:0003924]; sulfate adenylyltransferase (ATP) activity [GO:0004781]	NA
P56898	DNA recombination [GO:0006310]; DNA repair [GO:0006281]; DNA replication [GO:0006260]	single-stranded DNA binding [GO:0003697]	NA
P56909	NA	2 iron, 2 sulfur cluster binding [GO:0051537]; metal ion binding [GO:0046872]; oxidoreductase activity [GO:0016491]; quinone binding [GO:0048038]	NA
P56912	NA	4 iron, 4 sulfur cluster binding [GO:0051539]; FMN binding [GO:0010181]; metal ion binding [GO:0046872]; NAD binding [GO:0051287]; NADH dehydrogenase (ubiquinone) activity [GO:0008137]; quinone binding [GO:0048038]	NA
P58380	fatty acid biosynthetic process [GO:0006633]	enoyl-[acyl-carrier-protein] reductase (NADH) activity [GO:0004318]; enoyl-[acyl-carrier-protein] reductase activity [GO:0016631]	plasma membrane [GO:0005886]
P58381	fatty acid biosynthetic process [GO:0006633]	enoyl-[acyl-carrier-protein] reductase (NADH) activity [GO:0004318]; enoyl-[acyl-carrier-protein] reductase activity [GO:0016631]	plasma membrane [GO:0005886]
P72287	ion transport [GO:0006811]; oxidative phosphorylation [GO:0006119]	electron transfer activity [GO:0009055]; heme binding [GO:0020037]; iron ion binding [GO:0005506]	integral component of membrane [GO:0016021]; plasma membrane [GO:0005886]; respirasome [GO:0070469]
P72292	polysaccharide biosynthetic process [GO:0000271]	ATP binding [GO:0005524]; phosphorelay sensor kinase activity [GO:0000155]	integral component of membrane [GO:0016021]; plasma membrane [GO:0005886]
P72332	fatty acid biosynthetic process [GO:0006633]	3-oxoacyl-[acyl-carrier-protein] reductase (NADPH) activity [GO:0004316]; NAD binding [GO:0051287]	NA
P77935	'de novo' IMP biosynthetic process [GO:0006189]; glutamine metabolic process [GO:0006541]; purine nucleobase biosynthetic process [GO:0009113]	amidophosphoribosyltransferase activity [GO:0004044]	NA
Q01857	dicarboxylic acid transport [GO:0006835]	symporter activity [GO:0015293]	integral component of membrane [GO:0016021]; plasma membrane [GO:0005886]
Q03313	NA	NA	NA
Q05811	ion transport [GO:0006811]	porin activity [GO:0015288]	cell outer membrane [GO:0009279]; pore complex [GO:0046930]
Q1M3H2	protein refolding [GO:0042026]	ATP binding [GO:0005524]; ATP hydrolysis activity [GO:0016887]; isomerase activity [GO:0016853]; unfolded protein binding [GO:0051082]	cytoplasm [GO:0005737]
Q1M498	hydrogen peroxide catabolic process [GO:0042744]; response to oxidative stress [GO:0006979]	catalase activity [GO:0004096]; heme binding [GO:0020037]; metal ion binding [GO:0046872]	NA
Q1M4A0	pantothenate biosynthetic process [GO:0015940]	3-methyl-2-oxobutanoate hydroxymethyltransferase activity [GO:0003864]; metal ion binding [GO:0046872]	cytoplasm [GO:0005737]
Q1M755	NA	metal ion binding [GO:0046872]	extracellular region [GO:0005576]
Q1M7A2	amino acid transport [GO:0006865]	transmembrane transporter activity [GO:0022857]	integral component of membrane [GO:0016021]; plasma membrane [GO:0005886]
Q1MA25	leucyl-tRNA aminoacylation [GO:0006429]	aminoacyl-tRNA editing activity [GO:0002161]; ATP binding [GO:0005524]; leucine-tRNA ligase activity [GO:0004823]	cytoplasm [GO:0005737]
Q1MA35	'de novo' IMP biosynthetic process [GO:0006189]	IMP cyclohydrolase activity [GO:0003937]; phosphoribosylaminoimidazolecarboxamide formyltransferase activity [GO:0004643]	NA
Q1MA50	leucine biosynthetic process [GO:0009098]	3-isopropylmalate dehydrogenase activity [GO:0003862]; magnesium ion binding [GO:0000287]; NAD binding [GO:0051287]	cytoplasm [GO:0005737]
Q1MA52	leucine biosynthetic process [GO:0009098]	3-isopropylmalate dehydratase activity [GO:0003861]	3-isopropylmalate dehydratase complex [GO:0009316]
Q1MA76	ribosome biogenesis [GO:0042254]	GTP binding [GO:0005525]; GTPase activity [GO:0003924]; magnesium ion binding [GO:0000287]	cytoplasm [GO:0005737]
Q1MAF5	NA	translation elongation factor activity [GO:0003746]	cytoplasm [GO:0005737]
Q1MAJ9	leucine biosynthetic process [GO:0009098]	3-isopropylmalate dehydratase activity [GO:0003861]; 4 iron, 4 sulfur cluster binding [GO:0051539]; metal ion binding [GO:0046872]	NA
Q1MAN9	arginine biosynthetic process [GO:0006526]	argininosuccinate synthase activity [GO:0004055]; ATP binding [GO:0005524]	cytoplasm [GO:0005737]
Q1MAQ8	tRNA threonylcarbamoyladenosine modification [GO:0002949]	iron ion binding [GO:0005506]; N(6)-L-threonylcarbamoyladenine synthase activity [GO:0061711]	cytoplasm [GO:0005737]
Q1MAZ1	plasma membrane ATP synthesis coupled proton transport [GO:0042777]	ATP binding [GO:0005524]; proton-transporting ATP synthase activity, rotational mechanism [GO:0046933]	plasma membrane [GO:0005886]; proton-transporting ATP synthase complex, catalytic core F(1) [GO:0045261]
Q1MAZ2	NA	ATP binding [GO:0005524]; proton-transporting ATP synthase activity, rotational mechanism [GO:0046933]; proton-transporting ATPase activity, rotational mechanism [GO:0046961]	plasma membrane [GO:0005886]; proton-transporting ATP synthase complex, catalytic core F(1) [GO:0045261]
Q1MAZ3	NA	ATP binding [GO:0005524]; proton-transporting ATP synthase activity, rotational mechanism [GO:0046933]	plasma membrane [GO:0005886]; proton-transporting ATP synthase complex, catalytic core F(1) [GO:0045261]
Q1MB43	fatty acid biosynthetic process [GO:0006633]; malonyl-CoA biosynthetic process [GO:2001295]	acetyl-CoA carboxylase activity [GO:0003989]; ATP binding [GO:0005524]; carboxyl- or carbamoyltransferase activity [GO:0016743]	acetyl-CoA carboxylase complex [GO:0009317]
Q1MB73	arginine biosynthetic process via ornithine [GO:0042450]	argininosuccinate lyase activity [GO:0004056]	cytoplasm [GO:0005737]
Q1MB97	intracellular protein transmembrane transport [GO:0065002]; protein import [GO:0017038]; protein targeting [GO:0006605]	ATP binding [GO:0005524]; metal ion binding [GO:0046872]; protein-exporting ATPase activity [GO:0008564]	cytoplasm [GO:0005737]; plasma membrane [GO:0005886]
Q1MBL0	glutamyl-tRNA aminoacylation [GO:0006424]	ATP binding [GO:0005524]; glutamate-tRNA ligase activity [GO:0004818]; tRNA binding [GO:0000049]; zinc ion binding [GO:0008270]	cytoplasm [GO:0005737]
Q1MBL8	D-xylose metabolic process [GO:0042732]	magnesium ion binding [GO:0000287]; xylose isomerase activity [GO:0009045]	cytoplasm [GO:0005737]
Q1MBS8	glycogen biosynthetic process [GO:0005978]	ATP binding [GO:0005524]; glucose-1-phosphate adenylyltransferase activity [GO:0008878]	NA
Q1MBW8	heme biosynthetic process [GO:0006783]	ferrochelatase activity [GO:0004325]; metal ion binding [GO:0046872]	cytoplasm [GO:0005737]
Q1MC25	translation [GO:0006412]	rRNA binding [GO:0019843]; structural constituent of ribosome [GO:0003735]	ribosome [GO:0005840]
Q1MC77	carbohydrate metabolic process [GO:0005975]	magnesium ion binding [GO:0000287]; phosphoglucosamine mutase activity [GO:0008966]	NA
Q1MCV5	urea catabolic process [GO:0043419]	nickel cation binding [GO:0016151]; urease activity [GO:0009039]	cytoplasm [GO:0005737]
Q1MCV6	urea catabolic process [GO:0043419]	urease activity [GO:0009039]	urease complex [GO:0035550]
Q1MCV9	urea catabolic process [GO:0043419]	nickel cation binding [GO:0016151]; urease activity [GO:0009039]	cytoplasm [GO:0005737]
Q1MCW2	protein folding [GO:0006457]; protein-containing complex assembly [GO:0065003]; urea metabolic process [GO:0019627]	nickel cation binding [GO:0016151]; unfolded protein binding [GO:0051082]	cytoplasm [GO:0005737]
Q1MDG4	tetrahydrofolate interconversion [GO:0035999]	ATP binding [GO:0005524]; formate-tetrahydrofolate ligase activity [GO:0004329]	NA
Q1MDH4	NA	ATP-dependent peptidase activity [GO:0004176]; serine-type endopeptidase activity [GO:0004252]	cytoplasm [GO:0005737]
Q1MDH6	leucine biosynthetic process [GO:0009098]	2-isopropylmalate synthase activity [GO:0003852]	NA
Q1MDT5	L-threonine catabolic process to glycine [GO:0019518]	L-threonine 3-dehydrogenase activity [GO:0008743]; zinc ion binding [GO:0008270]	cytoplasm [GO:0005737]
Q1ME24	NA	DNA binding [GO:0003677]; DNA-binding transcription factor activity [GO:0003700]	cytoplasm [GO:0005737]; nucleoid [GO:0009295]
Q1ME25	rRNA base methylation [GO:0070475]	rRNA (cytosine-N4-)-methyltransferase activity [GO:0071424]	cytoplasm [GO:0005737]
Q1ME31	cell cycle [GO:0007049]; cell division [GO:0051301]; cell wall organization [GO:0071555]; peptidoglycan biosynthetic process [GO:0009252]; regulation of cell shape [GO:0008360]	ATP binding [GO:0005524]; tetrahydrofolylpolyglutamate synthase activity [GO:0004326]; UDP-N-acetylmuramoylalanine-D-glutamate ligase activity [GO:0008764]	cytoplasm [GO:0005737]
Q1ME33	carbohydrate metabolic process [GO:0005975]; cell cycle [GO:0007049]; cell division [GO:0051301]; cell wall organization [GO:0071555]; lipid glycosylation [GO:0030259]; peptidoglycan biosynthetic process [GO:0009252]; regulation of cell shape [GO:0008360]	UDP-N-acetyl-D-glucosamine:N-acetylmuramoyl-L-alanyl-D-glutamyl-meso-2,6-diaminopimelyl-D-alanyl-D-alanine-diphosphoundecaprenol 4-beta-N-acetylglucosaminlytransferase activity [GO:0051991]; undecaprenyldiphospho-muramoylpentapeptide beta-N-acetylglucosaminyltransferase activity [GO:0050511]	plasma membrane [GO:0005886]
Q1ME34	cell cycle [GO:0007049]; cell division [GO:0051301]; cell wall organization [GO:0071555]; peptidoglycan biosynthetic process [GO:0009252]; regulation of cell shape [GO:0008360]	ATP binding [GO:0005524]; UDP-N-acetylmuramate-L-alanine ligase activity [GO:0008763]	cytoplasm [GO:0005737]
Q1ME47	DNA repair [GO:0006281]; DNA replication [GO:0006260]	DNA binding [GO:0003677]; DNA ligase (NAD+) activity [GO:0003911]; metal ion binding [GO:0046872]	NA
Q1ME53	NA	protein methyltransferase activity [GO:0008276]	cytoplasm [GO:0005737]
Q1MEX2	NA	potassium ion transmembrane transporter activity [GO:0015079]	integral component of membrane [GO:0016021]; plasma membrane [GO:0005886]
Q1MFI6	leucyl-tRNA aminoacylation [GO:0006429]	aminoacyl-tRNA editing activity [GO:0002161]; ATP binding [GO:0005524]; leucine-tRNA ligase activity [GO:0004823]	cytoplasm [GO:0005737]
Q1MFT6	pentose-phosphate shunt, non-oxidative branch [GO:0009052]	ribose-5-phosphate isomerase activity [GO:0004751]	NA
Q1MFZ6	nucleobase catabolic process [GO:0046113]	hydrolase activity, acting on glycosyl bonds [GO:0016798]; metal ion binding [GO:0046872]; pseudouridylate synthase activity [GO:0004730]	NA
Q1MFZ8	DNA recombination [GO:0006310]; DNA repair [GO:0006281]; SOS response [GO:0009432]	ATP binding [GO:0005524]; ATP-dependent activity, acting on DNA [GO:0008094]; damaged DNA binding [GO:0003684]; single-stranded DNA binding [GO:0003697]	cytoplasm [GO:0005737]
Q1MFZ9	alanyl-tRNA aminoacylation [GO:0006419]	alanine-tRNA ligase activity [GO:0004813]; ATP binding [GO:0005524]; tRNA binding [GO:0000049]; zinc ion binding [GO:0008270]	cytoplasm [GO:0005737]
Q1MG23	'de novo' IMP biosynthetic process [GO:0006189]	ATP binding [GO:0005524]; magnesium ion binding [GO:0000287]; phosphoribosylformylglycinamidine synthase activity [GO:0004642]	cytoplasm [GO:0005737]
Q1MG27	'de novo' IMP biosynthetic process [GO:0006189]; glutamine metabolic process [GO:0006541]	ATP binding [GO:0005524]; glutaminase activity [GO:0004359]; phosphoribosylformylglycinamidine synthase activity [GO:0004642]	cytoplasm [GO:0005737]
Q1MG62	glycine decarboxylation via glycine cleavage system [GO:0019464]	glycine dehydrogenase (decarboxylating) activity [GO:0004375]	NA
Q1MGA7	threonyl-tRNA aminoacylation [GO:0006435]	ATP binding [GO:0005524]; metal ion binding [GO:0046872]; threonine-tRNA ligase activity [GO:0004829]; tRNA binding [GO:0000049]	cytoplasm [GO:0005737]
Q1MGC4	'de novo' CTP biosynthetic process [GO:0044210]; glutamine metabolic process [GO:0006541]	ATP binding [GO:0005524]; CTP synthase activity [GO:0003883]; metal ion binding [GO:0046872]	NA
Q1MGP8	cell morphogenesis [GO:0000902]; cell wall organization [GO:0071555]; lipid A biosynthetic process [GO:0009245]; peptidoglycan biosynthetic process [GO:0009252]; regulation of cell shape [GO:0008360]; UDP-N-acetylglucosamine biosynthetic process [GO:0006048]	glucosamine-1-phosphate N-acetyltransferase activity [GO:0019134]; magnesium ion binding [GO:0000287]; UDP-N-acetylglucosamine diphosphorylase activity [GO:0003977]	cytoplasm [GO:0005737]
Q1MGZ1	regulation of transcription, DNA-templated [GO:0006355]	RNA binding [GO:0003723]	NA
Q1MH21	isopentenyl diphosphate biosynthetic process, methylerythritol 4-phosphate pathway [GO:0019288]; terpenoid biosynthetic process [GO:0016114]	2-C-methyl-D-erythritol 2,4-cyclodiphosphate synthase activity [GO:0008685]; 2-C-methyl-D-erythritol 4-phosphate cytidylyltransferase activity [GO:0050518]; metal ion binding [GO:0046872]	NA
Q1MH44	lipid A biosynthetic process [GO:0009245]	acyl-[acyl-carrier-protein]-UDP-N-acetylglucosamine O-acyltransferase activity [GO:0008780]	cytoplasm [GO:0005737]
Q1MH45	fatty acid biosynthetic process [GO:0006633]; lipid A biosynthetic process [GO:0009245]	(3R)-hydroxymyristoyl-[acyl-carrier-protein] dehydratase activity [GO:0008659]; 3-hydroxydecanoyl-[acyl-carrier-protein] dehydratase activity [GO:0008693]; 3-hydroxyoctanoyl-[acyl-carrier-protein] dehydratase activity [GO:0047451]; 3-hydroxypalmitoyl-[acyl-carrier-protein] dehydratase activity [GO:0004317]	cytoplasm [GO:0005737]
Q1MH46	lipid A biosynthetic process [GO:0009245]	N-acyltransferase activity [GO:0016410]	NA
Q1MH52	'de novo' CTP biosynthetic process [GO:0044210]	ATP binding [GO:0005524]; UMP kinase activity [GO:0033862]	cytoplasm [GO:0005737]
Q1MHI9	translation [GO:0006412]	asparaginyl-tRNA synthase (glutamine-hydrolyzing) activity [GO:0050566]; ATP binding [GO:0005524]; glutaminyl-tRNA synthase (glutamine-hydrolyzing) activity [GO:0050567]	NA
Q1MHK9	cell cycle [GO:0007049]; cell division [GO:0051301]; protein folding [GO:0006457]; protein transport [GO:0015031]	peptidyl-prolyl cis-trans isomerase activity [GO:0003755]	cytoplasm [GO:0005737]
Q1MHL2	NA	5,10-methylenetetrahydrofolate-dependent tRNA (m5U54) methyltransferase activity [GO:0030698]; flavin adenine dinucleotide binding [GO:0050660]; methylenetetrahydrofolate-tRNA-(uracil-5-)-methyltransferase (FADH2-oxidizing) activity [GO:0047151]	cytoplasm [GO:0005737]
Q1MHM4	protein transport by the Tat complex [GO:0043953]	protein transmembrane transporter activity [GO:0008320]	integral component of plasma membrane [GO:0005887]; TAT protein transport complex [GO:0033281]
Q1MHN1	NA	triphosphoric monoester hydrolase activity [GO:0016793]	NA
Q1MIB2	isoleucine biosynthetic process [GO:0009097]; valine biosynthetic process [GO:0009099]	4 iron, 4 sulfur cluster binding [GO:0051539]; dihydroxy-acid dehydratase activity [GO:0004160]; metal ion binding [GO:0046872]	NA
Q1MIB6	translation [GO:0006412]	structural constituent of ribosome [GO:0003735]	ribosome [GO:0005840]
Q1MIC2	translation [GO:0006412]	rRNA binding [GO:0019843]; structural constituent of ribosome [GO:0003735]	large ribosomal subunit [GO:0015934]
Q1MIC3	translation [GO:0006412]	structural constituent of ribosome [GO:0003735]	large ribosomal subunit [GO:0015934]
Q1MIC5	translation [GO:0006412]	rRNA binding [GO:0019843]; structural constituent of ribosome [GO:0003735]	ribosome [GO:0005840]
Q1MID0	translation [GO:0006412]	rRNA binding [GO:0019843]; structural constituent of ribosome [GO:0003735]	ribosome [GO:0005840]
Q1MID1	translation [GO:0006412]	rRNA binding [GO:0019843]; structural constituent of ribosome [GO:0003735]	large ribosomal subunit [GO:0015934]
Q1MID5	translation [GO:0006412]	mRNA binding [GO:0003729]; rRNA binding [GO:0019843]; structural constituent of ribosome [GO:0003735]	ribosome [GO:0005840]
Q1MID8	translation [GO:0006412]	rRNA binding [GO:0019843]; structural constituent of ribosome [GO:0003735]; transferase activity [GO:0016740]	large ribosomal subunit [GO:0015934]
Q1MIE1	translation [GO:0006412]	rRNA binding [GO:0019843]; structural constituent of ribosome [GO:0003735]	ribosome [GO:0005840]
Q1MIE3	NA	GTP binding [GO:0005525]; GTPase activity [GO:0003924]; translation elongation factor activity [GO:0003746]	cytoplasm [GO:0005737]
Q1MIE4	NA	GTP binding [GO:0005525]; GTPase activity [GO:0003924]; translation elongation factor activity [GO:0003746]	cytoplasm [GO:0005737]
Q1MIE5	translation [GO:0006412]	rRNA binding [GO:0019843]; structural constituent of ribosome [GO:0003735]; tRNA binding [GO:0000049]	small ribosomal subunit [GO:0015935]
Q1MIE8	transcription, DNA-templated [GO:0006351]	DNA binding [GO:0003677]; DNA-directed 5'-3' RNA polymerase activity [GO:0003899]; magnesium ion binding [GO:0000287]; zinc ion binding [GO:0008270]	NA
Q1MIE9	transcription, DNA-templated [GO:0006351]	DNA binding [GO:0003677]; DNA-directed 5'-3' RNA polymerase activity [GO:0003899]; ribonucleoside binding [GO:0032549]	NA
Q1MIF1	translation [GO:0006412]	large ribosomal subunit rRNA binding [GO:0070180]	ribosome [GO:0005840]
Q1MII4	translation [GO:0006412]	structural constituent of ribosome [GO:0003735]	ribosome [GO:0005840]
Q1MIJ6	prolyl-tRNA aminoacylation [GO:0006433]	ATP binding [GO:0005524]; proline-tRNA ligase activity [GO:0004827]	cytoplasm [GO:0005737]
Q1MIK6	NA	4 iron, 4 sulfur cluster binding [GO:0051539]; iron ion binding [GO:0005506]; NADH dehydrogenase (quinone) activity [GO:0050136]; quinone binding [GO:0048038]	plasma membrane [GO:0005886]
Q1MIL2	NA	NAD binding [GO:0051287]; NADH dehydrogenase (quinone) activity [GO:0050136]; quinone binding [GO:0048038]	plasma membrane [GO:0005886]
Q1MIL3	NA	NADH dehydrogenase (ubiquinone) activity [GO:0008137]; quinone binding [GO:0048038]	plasma membrane [GO:0005886]
Q1MIL4	NA	4 iron, 4 sulfur cluster binding [GO:0051539]; iron ion binding [GO:0005506]; NADH dehydrogenase (ubiquinone) activity [GO:0008137]; quinone binding [GO:0048038]	plasma membrane [GO:0005886]
Q1MIM6	protein folding [GO:0006457]	ATP binding [GO:0005524]; ATP hydrolysis activity [GO:0016887]; protein dimerization activity [GO:0046983]; unfolded protein binding [GO:0051082]; zinc ion binding [GO:0008270]	NA
Q1MIM7	NA	ATP-dependent peptidase activity [GO:0004176]; serine-type endopeptidase activity [GO:0004252]	cytoplasm [GO:0005737]
Q1MIS6	fatty acid biosynthetic process [GO:0006633]	3-oxoacyl-[acyl-carrier-protein] synthase activity [GO:0004315]; beta-ketoacyl-acyl-carrier-protein synthase III activity [GO:0033818]	cytoplasm [GO:0005737]
Q1MIU5	glycine biosynthetic process from serine [GO:0019264]; tetrahydrofolate interconversion [GO:0035999]	glycine hydroxymethyltransferase activity [GO:0004372]; pyridoxal phosphate binding [GO:0030170]	cytoplasm [GO:0005737]
Q1MIW0	aspartyl-tRNA aminoacylation [GO:0006422]	aspartate-tRNA ligase activity [GO:0004815]; aspartate-tRNA(Asn) ligase activity [GO:0050560]; ATP binding [GO:0005524]; nucleic acid binding [GO:0003676]	cytoplasm [GO:0005737]
Q1MIZ4	NA	manganese ion binding [GO:0030145]; metalloaminopeptidase activity [GO:0070006]	cytoplasm [GO:0005737]
Q1MJ10	translation [GO:0006412]	rRNA binding [GO:0019843]; structural constituent of ribosome [GO:0003735]	ribosome [GO:0005840]
Q1MJ11	translation [GO:0006412]	rRNA binding [GO:0019843]; structural constituent of ribosome [GO:0003735]	ribosome [GO:0005840]
Q1MJ32	phosphatidylethanolamine biosynthetic process [GO:0006646]	phosphatidylserine decarboxylase activity [GO:0004609]	plasma membrane [GO:0005886]
Q1MJ94	lipopolysaccharide biosynthetic process [GO:0009103]; lipopolysaccharide core region biosynthetic process [GO:0009244]	hexosyltransferase activity [GO:0016758]	integral component of membrane [GO:0016021]; plasma membrane [GO:0005886]
Q1MJ95	lipid glycosylation [GO:0030259]; lipopolysaccharide biosynthetic process [GO:0009103]	glycosyltransferase activity [GO:0016757]	integral component of membrane [GO:0016021]; plasma membrane [GO:0005886]
Q1MJK8	NA	ATP binding [GO:0005524]; magnesium ion binding [GO:0000287]; nucleotidyltransferase activity [GO:0016779]	NA
Q1MJR4	translation [GO:0006412]	structural constituent of ribosome [GO:0003735]	ribosome [GO:0005840]
Q1MJU3	glycine betaine biosynthetic process from choline [GO:0019285]	betaine-aldehyde dehydrogenase activity [GO:0008802]; metal ion binding [GO:0046872]	NA
Q1MKH3	NA	NA	NA
Q1MKK1	aromatic amino acid family biosynthetic process [GO:0009073]; cellular amino acid biosynthetic process [GO:0008652]; chorismate biosynthetic process [GO:0009423]	chorismate synthase activity [GO:0004107]	NA
Q1MKN4	1-deoxy-D-xylulose 5-phosphate biosynthetic process [GO:0052865]; terpenoid biosynthetic process [GO:0016114]; thiamine biosynthetic process [GO:0009228]	1-deoxy-D-xylulose-5-phosphate synthase activity [GO:0008661]; magnesium ion binding [GO:0000287]; thiamine pyrophosphate binding [GO:0030976]	NA
Q1MKQ6	arginyl-tRNA aminoacylation [GO:0006420]; glycyl-tRNA aminoacylation [GO:0006426]	arginine-tRNA ligase activity [GO:0004814]; ATP binding [GO:0005524]; glycine-tRNA ligase activity [GO:0004820]	cytoplasm [GO:0005737]
Q1MKT0	NA	proton-transporting ATP synthase activity, rotational mechanism [GO:0046933]	integral component of membrane [GO:0016021]; plasma membrane [GO:0005886]; proton-transporting ATP synthase complex, coupling factor F(o) [GO:0045263]
Q1MKT5	NA	potassium ion transmembrane transporter activity [GO:0015079]	integral component of membrane [GO:0016021]; plasma membrane [GO:0005886]
Q1MKX4	protein refolding [GO:0042026]	ATP binding [GO:0005524]; ATP hydrolysis activity [GO:0016887]; isomerase activity [GO:0016853]; unfolded protein binding [GO:0051082]	cytoplasm [GO:0005737]
Q1MKY0	histidyl-tRNA aminoacylation [GO:0006427]	ATP binding [GO:0005524]; histidine-tRNA ligase activity [GO:0004821]	cytoplasm [GO:0005737]
Q1MLH5	lipid A biosynthetic process [GO:0009245]; lipopolysaccharide biosynthetic process [GO:0009103]	hexosyltransferase activity [GO:0016758]	integral component of membrane [GO:0016021]; plasma membrane [GO:0005886]
Q1MLP2	nucleotide metabolic process [GO:0009117]	dTTP diphosphatase activity [GO:0036218]; NADH pyrophosphatase activity [GO:0035529]; UTP diphosphatase activity [GO:0036221]	cytoplasm [GO:0005737]
Q1MLP8	cell cycle [GO:0007049]; cell division [GO:0051301]; cell wall organization [GO:0071555]; peptidoglycan biosynthetic process [GO:0009252]; regulation of cell shape [GO:0008360]; UDP-N-acetylgalactosamine biosynthetic process [GO:0019277]	UDP-N-acetylglucosamine 1-carboxyvinyltransferase activity [GO:0008760]	cytoplasm [GO:0005737]
Q1MLW4	NA	ATP binding [GO:0005524]; ATPase-coupled phosphate ion transmembrane transporter activity [GO:0015415]; inorganic phosphate transmembrane transporter activity [GO:0005315]	plasma membrane [GO:0005886]
Q1MM06	gluconeogenesis [GO:0006094]; glycolytic process [GO:0006096]	glucose-6-phosphate isomerase activity [GO:0004347]	cytoplasm [GO:0005737]
Q1MM58	protein transport [GO:0015031]	membrane insertase activity [GO:0032977]	integral component of membrane [GO:0016021]; plasma membrane [GO:0005886]
Q1MM66	arginine biosynthetic process via ornithine [GO:0042450]	acetylglutamate kinase activity [GO:0003991]; ATP binding [GO:0005524]	cytoplasm [GO:0005737]
Q1MM74	diaminopimelate biosynthetic process [GO:0019877]; lysine biosynthetic process via diaminopimelate [GO:0009089]	2,3,4,5-tetrahydropyridine-2,6-dicarboxylate N-succinyltransferase activity [GO:0008666]	cytoplasm [GO:0005737]
Q1MM75	diaminopimelate biosynthetic process [GO:0019877]; lysine biosynthetic process via diaminopimelate [GO:0009089]	cobalt ion binding [GO:0050897]; succinyl-diaminopimelate desuccinylase activity [GO:0009014]; zinc ion binding [GO:0008270]	NA
Q1MMA5	mismatch repair [GO:0006298]	ATP binding [GO:0005524]; damaged DNA binding [GO:0003684]; mismatched DNA binding [GO:0030983]	NA
Q1MMC9	protein folding [GO:0006457]	adenyl-nucleotide exchange factor activity [GO:0000774]; chaperone binding [GO:0051087]; protein homodimerization activity [GO:0042803]	cytoplasm [GO:0005737]
Q1MMD1	rRNA catabolic process [GO:0016075]; rRNA processing [GO:0006364]; tRNA processing [GO:0008033]	3'-5'-exoribonuclease activity [GO:0000175]; tRNA binding [GO:0000049]; tRNA nucleotidyltransferase activity [GO:0009022]	NA
Q1MMJ7	glutamine metabolic process [GO:0006541]	ATP binding [GO:0005524]; GMP synthase (glutamine-hydrolyzing) activity [GO:0003922]; pyrophosphatase activity [GO:0016462]	NA
Q1MMP3	phenylalanyl-tRNA aminoacylation [GO:0006432]	ATP binding [GO:0005524]; magnesium ion binding [GO:0000287]; phenylalanine-tRNA ligase activity [GO:0004826]; tRNA binding [GO:0000049]	cytoplasm [GO:0005737]
Q1MMP4	ribosomal large subunit assembly [GO:0000027]; translation [GO:0006412]	rRNA binding [GO:0019843]; structural constituent of ribosome [GO:0003735]	ribosome [GO:0005840]
Q1MMQ8	positive regulation of translation [GO:0045727]	GTP binding [GO:0005525]; GTPase activity [GO:0003924]; ribosome binding [GO:0043022]; translation elongation factor activity [GO:0003746]	plasma membrane [GO:0005886]
Q1MMY4	gluconeogenesis [GO:0006094]; glycolytic process [GO:0006096]	2,3-bisphosphoglycerate-dependent phosphoglycerate mutase activity [GO:0046538]	NA
Q1MN11	protein folding [GO:0006457]	ATP binding [GO:0005524]; ATP hydrolysis activity [GO:0016887]; unfolded protein binding [GO:0051082]	NA
Q1MN12	DNA replication [GO:0006260]; protein folding [GO:0006457]; response to heat [GO:0009408]	ATP binding [GO:0005524]; heat shock protein binding [GO:0031072]; unfolded protein binding [GO:0051082]; zinc ion binding [GO:0008270]	cytoplasm [GO:0005737]
Q1MN39	NA	GTP binding [GO:0005525]; GTPase activity [GO:0003924]; translation initiation factor activity [GO:0003743]	cytoplasm [GO:0005737]
Q1MNB3	protein unfolding [GO:0043335]	ATP binding [GO:0005524]; ATP hydrolysis activity [GO:0016887]; peptidase activity [GO:0008233]; proteasome-activating activity [GO:0036402]	HslUV protease complex [GO:0009376]
Q1MNB6	histidine biosynthetic process [GO:0000105]	imidazoleglycerol-phosphate dehydratase activity [GO:0004424]	cytoplasm [GO:0005737]
Q1MNC6	one-carbon metabolic process [GO:0006730]	adenosylhomocysteinase activity [GO:0004013]	cytoplasm [GO:0005737]
Q1MND4	fatty acid biosynthetic process [GO:0006633]; malonyl-CoA biosynthetic process [GO:2001295]	acetyl-CoA carboxylase activity [GO:0003989]; ATP binding [GO:0005524]; carboxyl- or carbamoyltransferase activity [GO:0016743]	acetyl-CoA carboxylase complex [GO:0009317]
Q1MNF1	protein folding [GO:0006457]; protein tetramerization [GO:0051262]; protein transport [GO:0015031]	unfolded protein binding [GO:0051082]	cytoplasm [GO:0005737]
Q1MNG2	gluconeogenesis [GO:0006094]	ATP binding [GO:0005524]; metal ion binding [GO:0046872]; phosphoenolpyruvate carboxykinase (ATP) activity [GO:0004612]	cytoplasm [GO:0005737]
Q2JZH2	protein folding [GO:0006457]	ATP binding [GO:0005524]; ATP hydrolysis activity [GO:0016887]; unfolded protein binding [GO:0051082]	cytoplasm [GO:0005737]
Q2K379	translation [GO:0006412]	structural constituent of ribosome [GO:0003735]	ribosome [GO:0005840]
Q2K619	DNA-templated transcription, initiation [GO:0006352]	DNA binding [GO:0003677]; sigma factor activity [GO:0016987]	cytoplasm [GO:0005737]
Q2K7S4	NA	NA	integral component of membrane [GO:0016021]; plasma membrane [GO:0005886]
Q2K8W9	glycolytic process [GO:0006096]	magnesium ion binding [GO:0000287]; phosphopyruvate hydratase activity [GO:0004634]	cell surface [GO:0009986]; extracellular region [GO:0005576]; phosphopyruvate hydratase complex [GO:0000015]
Q2K9D7	GMP salvage [GO:0032263]; purine ribonucleoside salvage [GO:0006166]; XMP salvage [GO:0032265]	guanine phosphoribosyltransferase activity [GO:0052657]; hypoxanthine phosphoribosyltransferase activity [GO:0004422]; magnesium ion binding [GO:0000287]; xanthine phosphoribosyltransferase activity [GO:0000310]	plasma membrane [GO:0005886]
Q2K9J2	transcription, DNA-templated [GO:0006351]	DNA binding [GO:0003677]; DNA-directed 5'-3' RNA polymerase activity [GO:0003899]; protein dimerization activity [GO:0046983]	NA
Q2K9K7	translation [GO:0006412]	rRNA binding [GO:0019843]; structural constituent of ribosome [GO:0003735]	ribosome [GO:0005840]
Q2K9L2	translation [GO:0006412]	rRNA binding [GO:0019843]; structural constituent of ribosome [GO:0003735]	small ribosomal subunit [GO:0015935]
Q2K9M8	translation [GO:0006412]	large ribosomal subunit rRNA binding [GO:0070180]; structural constituent of ribosome [GO:0003735]	ribosome [GO:0005840]
Q2K9P5	'de novo' pyrimidine nucleobase biosynthetic process [GO:0006207]; 'de novo' UMP biosynthetic process [GO:0044205]; cellular amino acid metabolic process [GO:0006520]	amino acid binding [GO:0016597]; aspartate carbamoyltransferase activity [GO:0004070]	NA
Q2K9P7	phospholipid biosynthetic process [GO:0008654]	acyl-phosphate glycerol-3-phosphate acyltransferase activity [GO:0043772]	integral component of membrane [GO:0016021]; plasma membrane [GO:0005886]
Q2K9R9	ATP synthesis coupled electron transport [GO:0042773]	NADH dehydrogenase (ubiquinone) activity [GO:0008137]; quinone binding [GO:0048038]	integral component of membrane [GO:0016021]; plasma membrane [GO:0005886]
Q2KBV8	NA	proton-transporting ATP synthase activity, rotational mechanism [GO:0046933]	integral component of membrane [GO:0016021]; plasma membrane [GO:0005886]; proton-transporting ATP synthase complex, coupling factor F(o) [GO:0045263]
Q2KBW1	NA	proton-transporting ATP synthase activity, rotational mechanism [GO:0046933]	integral component of membrane [GO:0016021]; plasma membrane [GO:0005886]; proton-transporting ATP synthase complex, coupling factor F(o) [GO:0045263]
Q2KCN5	NA	ribosome binding [GO:0043022]; rRNA binding [GO:0019843]; translation initiation factor activity [GO:0003743]	cytoplasm [GO:0005737]
Q2KDI7	DNA catabolic process [GO:0006308]	exodeoxyribonuclease VII activity [GO:0008855]; nucleic acid binding [GO:0003676]	cytoplasm [GO:0005737]; exodeoxyribonuclease VII complex [GO:0009318]
Q2KDK2	translation [GO:0006412]	structural constituent of ribosome [GO:0003735]	ribosome [GO:0005840]
Q52728	poly-hydroxybutyrate biosynthetic process [GO:0042619]	acyltransferase activity [GO:0016746]	cytoplasm [GO:0005737]
Q52811	methionine biosynthetic process [GO:0009086]; transsulfuration [GO:0019346]	cystathionine beta-lyase activity [GO:0004121]; cysteine-S-conjugate beta-lyase activity [GO:0047804]; pyridoxal phosphate binding [GO:0030170]	NA
Q52812	amino acid import [GO:0043090]; isoleucine transport [GO:0015818]; L-glutamate import [GO:0051938]; leucine transport [GO:0015820]; valine transport [GO:0015829]	glutamate binding [GO:0016595]; leucine binding [GO:0070728]	ATP-binding cassette (ABC) transporter complex, substrate-binding subunit-containing [GO:0055052]; outer membrane-bounded periplasmic space [GO:0030288]
Q52813	amino acid transport [GO:0006865]	transmembrane transporter activity [GO:0022857]	ATP-binding cassette (ABC) transporter complex [GO:0043190]
Q52814	amino acid transport [GO:0006865]	transmembrane transporter activity [GO:0022857]	ATP-binding cassette (ABC) transporter complex [GO:0043190]
Q52815	NA	ABC-type amino acid transporter activity [GO:0015424]; ATP binding [GO:0005524]	NA
Q52866	NA	NA	cell outer membrane [GO:0009279]
Q52894	NA	serine-type endopeptidase activity [GO:0004252]	outer membrane-bounded periplasmic space [GO:0030288]
Q52995	fatty acid metabolic process [GO:0006631]	enoyl-CoA hydratase activity [GO:0004300]	NA
Q53209	nitrogen fixation [GO:0009399]	electron transfer activity [GO:0009055]; flavin adenine dinucleotide binding [GO:0050660]	NA
Q53210	nitrogen fixation [GO:0009399]	electron transfer activity [GO:0009055]	NA
Q59754	pyruvate metabolic process [GO:0006090]	ATP binding [GO:0005524]; kinase activity [GO:0016301]; metal ion binding [GO:0046872]; pyruvate, phosphate dikinase activity [GO:0050242]	NA
Q8U8M6	translation [GO:0006412]	structural constituent of ribosome [GO:0003735]	ribosome [GO:0005840]
Q8U9L5	cell cycle [GO:0007049]; cell division [GO:0051301]	NA	cell outer membrane [GO:0009279]; integral component of membrane [GO:0016021]
Q8UD54	queuosine biosynthetic process [GO:0008616]	oxidoreductase activity, acting on other nitrogenous compounds as donors, with NAD or NADP as acceptor [GO:0046857]; preQ1 synthase activity [GO:0033739]	cytoplasm [GO:0005737]
Q8UE32	translation [GO:0006412]	rRNA binding [GO:0019843]; structural constituent of ribosome [GO:0003735]	ribosome [GO:0005840]
Q8UE39	translation [GO:0006412]	rRNA binding [GO:0019843]; structural constituent of ribosome [GO:0003735]; tRNA binding [GO:0000049]	ribosome [GO:0005840]
Q8UEM4	DNA biosynthetic process [GO:0071897]; DNA replication [GO:0006260]	cobalamin binding [GO:0031419]; cobalt ion binding [GO:0050897]; nucleotide binding [GO:0000166]; ribonucleoside-diphosphate reductase activity, thioredoxin disulfide as acceptor [GO:0004748]	NA
Q8UF86	nucleotide-excision repair [GO:0006289]; SOS response [GO:0009432]	ATP binding [GO:0005524]; ATP hydrolysis activity [GO:0016887]; DNA binding [GO:0003677]; excinuclease ABC activity [GO:0009381]; zinc ion binding [GO:0008270]	cytoplasm [GO:0005737]; excinuclease repair complex [GO:0009380]
Q8UHJ6	isoleucyl-tRNA aminoacylation [GO:0006428]	aminoacyl-tRNA editing activity [GO:0002161]; ATP binding [GO:0005524]; isoleucine-tRNA ligase activity [GO:0004822]; tRNA binding [GO:0000049]	cytoplasm [GO:0005737]
Q8UHX1	histidine biosynthetic process [GO:0000105]	histidinol dehydrogenase activity [GO:0004399]; NAD binding [GO:0051287]; zinc ion binding [GO:0008270]	NA
Q8UII5	NA	ATP binding [GO:0005524]; glutathione synthase activity [GO:0004363]; metal ion binding [GO:0046872]	NA
Q8UIV8	diaminopimelate biosynthetic process [GO:0019877]; lysine biosynthetic process via diaminopimelate [GO:0009089]	4-hydroxy-tetrahydrodipicolinate reductase [GO:0008839]; NAD binding [GO:0051287]; NADP binding [GO:0050661]; oxidoreductase activity, acting on CH or CH2 groups, NAD or NADP as acceptor [GO:0016726]	cytoplasm [GO:0005737]
Q8VRZ3	NA	inorganic diphosphatase activity [GO:0004427]; magnesium ion binding [GO:0000287]; pyrophosphate hydrolysis-driven proton transmembrane transporter activity [GO:0009678]	integral component of plasma membrane [GO:0005887]
Q92L73	arginine biosynthetic process [GO:0006526]	argininosuccinate synthase activity [GO:0004055]; ATP binding [GO:0005524]	cytoplasm [GO:0005737]
Q92LB8	translation [GO:0006412]	rRNA binding [GO:0019843]; structural constituent of ribosome [GO:0003735]	ribosome [GO:0005840]
Q92MK7	protein refolding [GO:0042026]; response to heat [GO:0009408]	ATP binding [GO:0005524]; ATP hydrolysis activity [GO:0016887]	cytoplasm [GO:0005737]
Q92N73	5-phosphoribose 1-diphosphate biosynthetic process [GO:0006015]; nucleotide biosynthetic process [GO:0009165]; ribonucleoside monophosphate biosynthetic process [GO:0009156]	ATP binding [GO:0005524]; kinase activity [GO:0016301]; magnesium ion binding [GO:0000287]; ribose phosphate diphosphokinase activity [GO:0004749]	cytoplasm [GO:0005737]
Q92N95	'de novo' pyrimidine nucleobase biosynthetic process [GO:0006207]; 'de novo' UMP biosynthetic process [GO:0044205]; arginine biosynthetic process [GO:0006526]; glutamine metabolic process [GO:0006541]	ATP binding [GO:0005524]; carbamoyl-phosphate synthase (glutamine-hydrolyzing) activity [GO:0004088]	NA
Q92PB6	fumarate metabolic process [GO:0006106]; tricarboxylic acid cycle [GO:0006099]	fumarate hydratase activity [GO:0004333]	tricarboxylic acid cycle enzyme complex [GO:0045239]
Q92PK5	tyrosyl-tRNA aminoacylation [GO:0006437]	ATP binding [GO:0005524]; RNA binding [GO:0003723]; tyrosine-tRNA ligase activity [GO:0004831]	cytoplasm [GO:0005737]
Q92PX0	methionyl-tRNA aminoacylation [GO:0006431]	ATP binding [GO:0005524]; methionine-tRNA ligase activity [GO:0004825]	cytoplasm [GO:0005737]
Q92PZ4	'de novo' UMP biosynthetic process [GO:0044205]; arginine biosynthetic process [GO:0006526]	ATP binding [GO:0005524]; carbamoyl-phosphate synthase (glutamine-hydrolyzing) activity [GO:0004088]; metal ion binding [GO:0046872]	NA
Q92Q37	valyl-tRNA aminoacylation [GO:0006438]	aminoacyl-tRNA editing activity [GO:0002161]; ATP binding [GO:0005524]; valine-tRNA ligase activity [GO:0004832]	cytoplasm [GO:0005737]
Q92Q99	keto-3-deoxy-D-manno-octulosonic acid biosynthetic process [GO:0019294]	3-deoxy-8-phosphooctulonate synthase activity [GO:0008676]	cytoplasm [GO:0005737]
Q92QG5	translation [GO:0006412]	rRNA binding [GO:0019843]; structural constituent of ribosome [GO:0003735]	large ribosomal subunit [GO:0015934]
Q92RL5	glycyl-tRNA aminoacylation [GO:0006426]	ATP binding [GO:0005524]; glycine-tRNA ligase activity [GO:0004820]	cytoplasm [GO:0005737]
Q92SS9	phenylalanyl-tRNA aminoacylation [GO:0006432]	ATP binding [GO:0005524]; magnesium ion binding [GO:0000287]; phenylalanine-tRNA ligase activity [GO:0004826]; tRNA binding [GO:0000049]	cytoplasm [GO:0005737]
Q92T74	carbohydrate metabolic process [GO:0005975]	aldehyde-lyase activity [GO:0016832]	NA
Q92ZA4	carbohydrate metabolic process [GO:0005975]	aldehyde-lyase activity [GO:0016832]	NA
Q92ZL2	nitrogen fixation [GO:0009399]; protein-containing complex assembly [GO:0065003]	nitrogenase activity [GO:0016163]	NA
Q93E15	histidine biosynthetic process [GO:0000105]; methionine biosynthetic process [GO:0009086]; purine nucleotide biosynthetic process [GO:0006164]; tetrahydrofolate interconversion [GO:0035999]	methenyltetrahydrofolate cyclohydrolase activity [GO:0004477]; methylenetetrahydrofolate dehydrogenase (NADP+) activity [GO:0004488]	NA
Q9F9K6	translation [GO:0006412]	rRNA binding [GO:0019843]; structural constituent of ribosome [GO:0003735]	ribosome [GO:0005840]
Q9FCP2	polysaccharide biosynthetic process [GO:0000271]	transferase activity [GO:0016740]	NA
Q9KH33	GMP biosynthetic process [GO:0006177]	IMP dehydrogenase activity [GO:0003938]; metal ion binding [GO:0046872]; nucleotide binding [GO:0000166]	NA
Q9L691	protein refolding [GO:0042026]	ATP binding [GO:0005524]; ATP hydrolysis activity [GO:0016887]; isomerase activity [GO:0016853]; unfolded protein binding [GO:0051082]	cytoplasm [GO:0005737]
Q9R9N3	acetyl-CoA biosynthetic process from pyruvate [GO:0006086]; glycolytic process [GO:0006096]	dihydrolipoyllysine-residue acetyltransferase activity [GO:0004742]	pyruvate dehydrogenase complex [GO:0045254]
Q9R9N4	acetyl-CoA biosynthetic process from pyruvate [GO:0006086]; glycolytic process [GO:0006096]	pyruvate dehydrogenase (acetyl-transferring) activity [GO:0004739]	NA
Q9R9N5	acetyl-CoA biosynthetic process from pyruvate [GO:0006086]; glycolytic process [GO:0006096]	pyruvate dehydrogenase (acetyl-transferring) activity [GO:0004739]	intracellular membrane-bounded organelle [GO:0043231]
Q9RAE4	nitrogen compound metabolic process [GO:0006807]; regulation of nitrogen utilization [GO:0006808]	[protein-PII] uridylyltransferase activity [GO:0008773]; phosphoric diester hydrolase activity [GO:0008081]	NA
Q9RAE6	D-alanine catabolic process [GO:0055130]	D-amino-acid dehydrogenase activity [GO:0008718]	NA
Q9S1G2	DNA repair [GO:0006281]; DNA-dependent DNA replication [GO:0006261]	3'-5' exonuclease activity [GO:0008408]; DNA binding [GO:0003677]; DNA-directed DNA polymerase activity [GO:0003887]	NA
Q9X4Y0	carbohydrate metabolic process [GO:0005975]	metal ion binding [GO:0046872]; oxidoreductase activity, acting on the CH-OH group of donors, NAD or NADP as acceptor [GO:0016616]; raffinose alpha-galactosidase activity [GO:0052692]	NA
Q9Z3R3	lipid metabolic process [GO:0006629]	acetoacetate-CoA ligase activity [GO:0030729]; ATP binding [GO:0005524]; metal ion binding [GO:0046872]	NA
Q9Z3R8	NA	maltose alpha-glucosidase activity [GO:0032450]	NA
Q9Z3S0	D-gluconate catabolic process [GO:0046177]; Entner-Doudoroff pathway through 6-phosphogluconate [GO:0009255]	4 iron, 4 sulfur cluster binding [GO:0051539]; metal ion binding [GO:0046872]; phosphogluconate dehydratase activity [GO:0004456]	NA
Q9Z3S2	glucose metabolic process [GO:0006006]; pentose-phosphate shunt [GO:0006098]	glucose-6-phosphate dehydrogenase activity [GO:0004345]; NADP binding [GO:0050661]	NA

## Sheet: GO Rhizobium (Fix-)
Supplementary Table 2. The underlying data on annotation of identified proteins with GO terms
UniProt ID	Gene Ontology: Biological process	Gene Ontology: Molecular function	Gene Ontology: Cellular component
A6U5H5	NA	DNA binding [GO:0003677]	NA
A6U6N3	isopentenyl diphosphate biosynthetic process, methylerythritol 4-phosphate pathway [GO:0019288]; terpenoid biosynthetic process [GO:0016114]	4-(cytidine 5'-diphospho)-2-C-methyl-D-erythritol kinase activity [GO:0050515]; ATP binding [GO:0005524]	NA
A6UB80	cell wall organization [GO:0071555]; peptidoglycan biosynthetic process [GO:0009252]; regulation of cell shape [GO:0008360]	ATP binding [GO:0005524]; D-alanine-D-alanine ligase activity [GO:0008716]; metal ion binding [GO:0046872]	cytoplasm [GO:0005737]
A6UCY0	NA	NA	NA
A9CHH2	SRP-dependent cotranslational protein targeting to membrane [GO:0006614]	GTP binding [GO:0005525]; GTPase activity [GO:0003924]	cytoplasm [GO:0005737]; intrinsic component of plasma membrane [GO:0031226]
A9CKA8	ATP biosynthetic process [GO:0006754]	polyphosphate kinase activity [GO:0008976]	NA
B3PP83	methylation [GO:0032259]; ubiquinone biosynthetic process [GO:0006744]	2-polyprenyl-6-hydroxyphenol methylase activity [GO:0102208]; 2-polyprenyl-6-methoxy-1,4-benzoquinone methyltransferase activity [GO:0008425]; 3-demethylubiquinone-9 3-O-methyltransferase activity [GO:0008689]	NA
B3PPT3	translation [GO:0006412]	rRNA binding [GO:0019843]; structural constituent of ribosome [GO:0003735]	small ribosomal subunit [GO:0015935]
B3PRH7	aromatic amino acid family biosynthetic process [GO:0009073]; cellular amino acid biosynthetic process [GO:0008652]; chorismate biosynthetic process [GO:0009423]	3-phosphoshikimate 1-carboxyvinyltransferase activity [GO:0003866]	cytoplasm [GO:0005737]
B3PSA1	pyridoxine biosynthetic process [GO:0008615]	FMN binding [GO:0010181]; pyridoxamine-phosphate oxidase activity [GO:0004733]	NA
B3PVB6	negative regulation of transcription, DNA-templated [GO:0045892]	ATP binding [GO:0005524]; DNA binding [GO:0003677]; zinc ion binding [GO:0008270]	NA
B3PVW3	translation [GO:0006412]	structural constituent of ribosome [GO:0003735]	ribosome [GO:0005840]
B3PVW4	translation [GO:0006412]	structural constituent of ribosome [GO:0003735]	ribosome [GO:0005840]
B3PWH8	histidine biosynthetic process [GO:0000105]	ATP binding [GO:0005524]; phosphoribosyl-ATP diphosphatase activity [GO:0004636]	cytoplasm [GO:0005737]
B3PWI6	proteolysis involved in cellular protein catabolic process [GO:0051603]	metal ion binding [GO:0046872]; threonine-type endopeptidase activity [GO:0004298]	HslUV protease complex [GO:0009376]; proteasome core complex [GO:0005839]
B3PWT4	translation [GO:0006412]	rRNA binding [GO:0019843]; structural constituent of ribosome [GO:0003735]	ribosome [GO:0005840]
B3PXD7	mRNA catabolic process [GO:0006402]; RNA processing [GO:0006396]	magnesium ion binding [GO:0000287]; polyribonucleotide nucleotidyltransferase activity [GO:0004654]; RNA binding [GO:0003723]	cytoplasm [GO:0005737]
B3PXI8	5-phosphoribose 1-diphosphate biosynthetic process [GO:0006015]; organic phosphonate metabolic process [GO:0019634]	ATP binding [GO:0005524]; ribose 1,5-bisphosphate phosphokinase activity [GO:0033863]	NA
B3PXK6	glycolytic process [GO:0006096]	ATP binding [GO:0005524]; glucokinase activity [GO:0004340]; glucose binding [GO:0005536]	cytoplasm [GO:0005737]
B3PXK7	methylglyoxal biosynthetic process [GO:0019242]	methylglyoxal synthase activity [GO:0008929]	NA
B3PXN1	adenine catabolic process [GO:0006146]; hypoxanthine salvage [GO:0043103]; nucleotide metabolic process [GO:0009117]	adenine deaminase activity [GO:0000034]; zinc ion binding [GO:0008270]	NA
B3PXU4	NA	5'-nucleotidase activity [GO:0008253]; metal ion binding [GO:0046872]; nucleotide binding [GO:0000166]	cytoplasm [GO:0005737]
B3PXY7	aromatic amino acid family biosynthetic process [GO:0009073]; cellular amino acid biosynthetic process [GO:0008652]; chorismate biosynthetic process [GO:0009423]	3-dehydroquinate dehydratase activity [GO:0003855]	NA
B3PYQ7	DNA repair [GO:0006281]; DNA replication [GO:0006260]; negative regulation of transcription, DNA-templated [GO:0045892]; SOS response [GO:0009432]	DNA binding [GO:0003677]; serine-type endopeptidase activity [GO:0004252]	NA
B3PYS0	protein lipoylation [GO:0009249]	4 iron, 4 sulfur cluster binding [GO:0051539]; lipoate synthase activity [GO:0016992]; lipoyl synthase activity (acting on glycine-cleavage complex H protein [GO:0102552]; lipoyl synthase activity (acting on pyruvate dehydrogenase E2 protein) [GO:0102553]; metal ion binding [GO:0046872]	cytoplasm [GO:0005737]
B3PZB4	rRNA processing [GO:0006364]	endoribonuclease activity [GO:0004521]; metalloendopeptidase activity [GO:0004222]; zinc ion binding [GO:0008270]	cytoplasm [GO:0005737]
B3PZE1	DNA recombination [GO:0006310]; regulation of transcription, DNA-templated [GO:0006355]; regulation of translation [GO:0006417]	DNA binding [GO:0003677]	chromosome [GO:0005694]
B5ZMF2	arginyl-tRNA aminoacylation [GO:0006420]	arginine-tRNA ligase activity [GO:0004814]; ATP binding [GO:0005524]	cytoplasm [GO:0005737]
B5ZMF7	protein transport by the Tat complex [GO:0043953]	protein transmembrane transporter activity [GO:0008320]	integral component of plasma membrane [GO:0005887]; TAT protein transport complex [GO:0033281]
B5ZMI9	regulation of translational fidelity [GO:0006450]; translation [GO:0006412]	asparaginyl-tRNA synthase (glutamine-hydrolyzing) activity [GO:0050566]; ATP binding [GO:0005524]; glutaminyl-tRNA synthase (glutamine-hydrolyzing) activity [GO:0050567]	NA
B5ZMJ0	translation [GO:0006412]	ATP binding [GO:0005524]; glutaminyl-tRNA synthase (glutamine-hydrolyzing) activity [GO:0050567]	glutamyl-tRNA(Gln) amidotransferase complex [GO:0030956]
B5ZMN5	nitrogen compound metabolic process [GO:0006807]	GTP binding [GO:0005525]; GTPase activity [GO:0003924]; nickel cation binding [GO:0016151]	cytoplasm [GO:0005737]
B5ZMS8	'de novo' AMP biosynthetic process [GO:0044208]	adenylosuccinate synthase activity [GO:0004019]; GTP binding [GO:0005525]; magnesium ion binding [GO:0000287]	cytoplasm [GO:0005737]
B5ZMW9	negative regulation of transcription, DNA-templated [GO:0045892]	DNA binding [GO:0003677]	NA
B5ZN20	NA	methionyl-tRNA formyltransferase activity [GO:0004479]	NA
B5ZN83	translation [GO:0006412]	structural constituent of ribosome [GO:0003735]	small ribosomal subunit [GO:0015935]
B5ZN84	NA	translation elongation factor activity [GO:0003746]	cytoplasm [GO:0005737]
B5ZNS1	'de novo' UMP biosynthetic process [GO:0044205]; pyrimidine nucleobase biosynthetic process [GO:0019856]	dihydroorotase activity [GO:0004151]; zinc ion binding [GO:0008270]	NA
B5ZP79	DNA recombination [GO:0006310]; DNA repair [GO:0006281]; SOS response [GO:0009432]	ATP binding [GO:0005524]; ATP hydrolysis activity [GO:0016887]; DNA binding [GO:0003677]; four-way junction helicase activity [GO:0009378]	Holliday junction helicase complex [GO:0009379]
B5ZPK8	NA	mechanosensitive ion channel activity [GO:0008381]	integral component of plasma membrane [GO:0005887]
B5ZQE0	bacterial-type flagellum-dependent cell motility [GO:0071973]	structural molecule activity [GO:0005198]	bacterial-type flagellum basal body, distal rod, P ring [GO:0009428]; outer membrane-bounded periplasmic space [GO:0030288]
B5ZQG0	bacterial-type flagellum organization [GO:0044781]; mRNA catabolic process [GO:0006402]; negative regulation of bacterial-type flagellum assembly [GO:1902209]	mRNA 5'-UTR binding [GO:0048027]	NA
B5ZQY2	carbohydrate metabolic process [GO:0005975]; pentose-phosphate shunt [GO:0006098]	transaldolase activity [GO:0004801]	cytoplasm [GO:0005737]
B5ZR94	NA	rRNA (uridine-2'-O-)-methyltransferase activity [GO:0008650]	cytoplasm [GO:0005737]
B5ZRD7	protein folding [GO:0006457]	ATP binding [GO:0005524]; ATP hydrolysis activity [GO:0016887]	cytoplasm [GO:0005737]
B5ZRX6	translation [GO:0006412]	structural constituent of ribosome [GO:0003735]	ribosome [GO:0005840]
B5ZS73	DNA catabolic process [GO:0006308]	exodeoxyribonuclease VII activity [GO:0008855]	cytoplasm [GO:0005737]; exodeoxyribonuclease VII complex [GO:0009318]
B5ZSI5	aromatic amino acid family biosynthetic process [GO:0009073]; cellular amino acid biosynthetic process [GO:0008652]; chorismate biosynthetic process [GO:0009423]	ATP binding [GO:0005524]; magnesium ion binding [GO:0000287]; shikimate kinase activity [GO:0004765]	cytoplasm [GO:0005737]
B5ZSN9	NA	ATP binding [GO:0005524]; proton-transporting ATP synthase activity, rotational mechanism [GO:0046933]; proton-transporting ATPase activity, rotational mechanism [GO:0046961]	plasma membrane [GO:0005886]; proton-transporting ATP synthase complex, catalytic core F(1) [GO:0045261]
B5ZSP0	NA	proton-transporting ATP synthase activity, rotational mechanism [GO:0046933]	plasma membrane [GO:0005886]; proton-transporting ATP synthase complex, catalytic core F(1) [GO:0045261]
B5ZSR9	tricarboxylic acid cycle [GO:0006099]	ATP binding [GO:0005524]; magnesium ion binding [GO:0000287]; succinate-CoA ligase (ADP-forming) activity [GO:0004775]	NA
B5ZSV9	dimethylallyl diphosphate biosynthetic process [GO:0050992]; isopentenyl diphosphate biosynthetic process, methylerythritol 4-phosphate pathway [GO:0019288]; terpenoid biosynthetic process [GO:0016114]	4 iron, 4 sulfur cluster binding [GO:0051539]; 4-hydroxy-3-methylbut-2-en-1-yl diphosphate reductase activity [GO:0051745]; metal ion binding [GO:0046872]	NA
B5ZTJ9	NA	NA	NA
B5ZUD9	translation [GO:0006412]	structural constituent of ribosome [GO:0003735]	ribosome [GO:0005840]
B5ZUE4	L-proline biosynthetic process [GO:0055129]	ATP binding [GO:0005524]; glutamate 5-kinase activity [GO:0004349]; RNA binding [GO:0003723]	cytoplasm [GO:0005737]
B5ZV36	acetyl-CoA biosynthetic process from acetate [GO:0019427]	acetate-CoA ligase activity [GO:0003987]; AMP binding [GO:0016208]; ATP binding [GO:0005524]; metal ion binding [GO:0046872]	NA
B5ZV70	NA	tryptophan synthase activity [GO:0004834]	NA
B5ZW32	ribosomal small subunit biogenesis [GO:0042274]	NA	cytoplasm [GO:0005737]
B5ZWU4	NAD biosynthetic process [GO:0009435]	nicotinate phosphoribosyltransferase activity [GO:0004516]; nicotinate-nucleotide diphosphorylase (carboxylating) activity [GO:0004514]	NA
B5ZXA0	NA	NA	NA
B5ZXI4	5-phosphoribose 1-diphosphate biosynthetic process [GO:0006015]; cellular metabolic compound salvage [GO:0043094]; deoxyribonucleotide catabolic process [GO:0009264]	magnesium ion binding [GO:0000287]; manganese ion binding [GO:0030145]; phosphopentomutase activity [GO:0008973]	cytoplasm [GO:0005737]
B5ZXR7	NA	translation initiation factor activity [GO:0003743]	cytoplasm [GO:0005737]
B5ZXV2	DNA-templated transcription, termination [GO:0006353]; regulation of transcription, DNA-templated [GO:0006355]; transcription antitermination [GO:0031564]	RNA binding [GO:0003723]	NA
B5ZXV9	DNA recombination [GO:0006310]; regulation of transcription, DNA-templated [GO:0006355]; regulation of translation [GO:0006417]	DNA binding [GO:0003677]	NA
B5ZXZ1	arginine biosynthetic process [GO:0006526]	N-acetyl-gamma-glutamyl-phosphate reductase activity [GO:0003942]; NAD binding [GO:0051287]	cytoplasm [GO:0005737]
B5ZY55	translation [GO:0006412]	aminoacyl-tRNA hydrolase activity [GO:0004045]	cytoplasm [GO:0005737]
B5ZY62	adenine salvage [GO:0006168]; AMP salvage [GO:0044209]; purine ribonucleoside salvage [GO:0006166]	adenine phosphoribosyltransferase activity [GO:0003999]	cytoplasm [GO:0005737]
B5ZYK8	aerobic respiration [GO:0009060]; menaquinone biosynthetic process [GO:0009234]; methylation [GO:0032259]; ubiquinone biosynthetic process [GO:0006744]	2-octaprenyl-6-methoxy-1,4-benzoquinone methylase activity [GO:0043333]; demethylmenaquinone methyltransferase activity [GO:0043770]; S-adenosylmethionine:2-demethylmenaquinol methyltransferase activity [GO:0102094]; S-adenosylmethionine:2-demethylmenaquinol-7 methyltransferase activity [GO:0102955]; S-adenosylmethionine:2-demethylquinol-8 methyltransferase activity [GO:0102027]	NA
B5ZYK9	base-excision repair [GO:0006284]	class I DNA-(apurinic or apyrimidinic site) endonuclease activity [GO:0140078]; damaged DNA binding [GO:0003684]; oxidized purine nucleobase lesion DNA N-glycosylase activity [GO:0008534]; zinc ion binding [GO:0008270]	NA
B5ZYL1	translation [GO:0006412]	rRNA binding [GO:0019843]; structural constituent of ribosome [GO:0003735]	ribosome [GO:0005840]
B5ZYT0	translation [GO:0006412]	rRNA binding [GO:0019843]; structural constituent of ribosome [GO:0003735]; tRNA binding [GO:0000049]	small ribosomal subunit [GO:0015935]
B5ZYT6	translation [GO:0006412]	rRNA binding [GO:0019843]; structural constituent of ribosome [GO:0003735]	ribosome [GO:0005840]
B5ZYU2	translation [GO:0006412]	rRNA binding [GO:0019843]; structural constituent of ribosome [GO:0003735]; tRNA binding [GO:0000049]	ribosome [GO:0005840]
B5ZYU7	translation [GO:0006412]	rRNA binding [GO:0019843]; structural constituent of ribosome [GO:0003735]; tRNA binding [GO:0000049]	ribosome [GO:0005840]
B5ZYV0	translation [GO:0006412]	rRNA binding [GO:0019843]; structural constituent of ribosome [GO:0003735]	ribosome [GO:0005840]
B5ZYV2	translation [GO:0006412]	rRNA binding [GO:0019843]; structural constituent of ribosome [GO:0003735]	small ribosomal subunit [GO:0015935]
B5ZYX3	ribosome biogenesis [GO:0042254]	GTP binding [GO:0005525]	NA
B5ZZ34	arabinose catabolic process [GO:0019568]	2 iron, 2 sulfur cluster binding [GO:0051537]; D-fuconate dehydratase activity [GO:0047818]; galactonate dehydratase activity [GO:0008869]; L-arabinonate dehydratase activity [GO:0050020]; metal ion binding [GO:0046872]	NA
B9JDC0	histidine catabolic process to glutamate and formamide [GO:0019556]; histidine catabolic process to glutamate and formate [GO:0019557]	histidine ammonia-lyase activity [GO:0004397]	cytoplasm [GO:0005737]
B9JDR8	regulation of translation [GO:0006417]; translation [GO:0006412]	rRNA binding [GO:0019843]; structural constituent of ribosome [GO:0003735]; tRNA binding [GO:0000049]	large ribosomal subunit [GO:0015934]
B9JER3	L-proline biosynthetic process [GO:0055129]	glutamate-5-semialdehyde dehydrogenase activity [GO:0004350]; NADP binding [GO:0050661]	cytoplasm [GO:0005737]
B9JEV2	NA	metalloendopeptidase activity [GO:0004222]; zinc ion binding [GO:0008270]	integral component of membrane [GO:0016021]; plasma membrane [GO:0005886]
B9JGS3	fatty acid biosynthetic process [GO:0006633]	(3R)-hydroxymyristoyl-[acyl-carrier-protein] dehydratase activity [GO:0008659]; 3-hydroxydecanoyl-[acyl-carrier-protein] dehydratase activity [GO:0008693]; 3-hydroxyoctanoyl-[acyl-carrier-protein] dehydratase activity [GO:0047451]; 3-hydroxypalmitoyl-[acyl-carrier-protein] dehydratase activity [GO:0004317]; trans-2-decenoyl-acyl-carrier-protein isomerase activity [GO:0034017]	cytoplasm [GO:0005737]
B9JJD5	cell morphogenesis [GO:0000902]; division septum assembly [GO:0000917]; regulation of cell septum assembly [GO:1901891]	NA	NA
B9JK75	carbohydrate metabolic process [GO:0005975]	metal ion binding [GO:0046872]; nucleotide binding [GO:0000166]; oxidoreductase activity [GO:0016491]	NA
B9JN19	carbohydrate metabolic process [GO:0005975]	isomerase activity [GO:0016853]	NA
B9JZR4	glycerol catabolic process [GO:0019563]; glycerol metabolic process [GO:0006071]; glycerol-3-phosphate metabolic process [GO:0006072]	ATP binding [GO:0005524]; glycerol kinase activity [GO:0004370]	NA
C3MD65	'de novo' IMP biosynthetic process [GO:0006189]; cobalamin biosynthetic process [GO:0009236]	ATP binding [GO:0005524]; phosphoribosylaminoimidazolesuccinocarboxamide synthase activity [GO:0004639]	NA
O05940	cell redox homeostasis [GO:0045454]; glycolytic process [GO:0006096]	dihydrolipoyl dehydrogenase activity [GO:0004148]; flavin adenine dinucleotide binding [GO:0050660]	cytoplasm [GO:0005737]
O07315	NA	DNA binding [GO:0003677]; DNA-binding transcription factor activity [GO:0003700]; metal ion binding [GO:0046872]	cytoplasm [GO:0005737]
O30807	malate metabolic process [GO:0006108]	acyltransferase activity [GO:0016746]; malate dehydrogenase (decarboxylating) (NAD+) activity [GO:0004471]; metal ion binding [GO:0046872]; NAD binding [GO:0051287]	NA
O30808	malate metabolic process [GO:0006108]	acyltransferase activity [GO:0016746]; malate dehydrogenase (decarboxylating) (NAD+) activity [GO:0004471]; malate dehydrogenase (decarboxylating) (NADP+) activity [GO:0004473]; metal ion binding [GO:0046872]; NAD binding [GO:0051287]; oxaloacetate decarboxylase activity [GO:0008948]	NA
O33525	carboxylic acid metabolic process [GO:0019752]; tricarboxylic acid cycle [GO:0006099]	L-malate dehydrogenase activity [GO:0030060]	NA
O33533	nitrogen fixation [GO:0009399]	ATP binding [GO:0005524]; ATP hydrolysis activity [GO:0016887]; ATPase-coupled cation transmembrane transporter activity [GO:0019829]; metal ion binding [GO:0046872]	integral component of membrane [GO:0016021]; plasma membrane [GO:0005886]
O33915	tricarboxylic acid cycle [GO:0006099]	citrate (Si)-synthase activity [GO:0004108]	cytoplasm [GO:0005737]
O54068	capsule polysaccharide biosynthetic process [GO:0045227]; UDP-glucuronate biosynthetic process [GO:0006065]	NAD binding [GO:0051287]; UDP-glucose 6-dehydrogenase activity [GO:0003979]	NA
O68547	lipopolysaccharide core region biosynthetic process [GO:0009244]	glycosyltransferase activity [GO:0016757]	NA
O68852	NA	NADH dehydrogenase (ubiquinone) activity [GO:0008137]; quinone binding [GO:0048038]	integral component of membrane [GO:0016021]; plasma membrane [GO:0005886]
O68965	NA	inositol 2-dehydrogenase activity [GO:0050112]; nucleotide binding [GO:0000166]	NA
O69177	cellular response to heat [GO:0034605]; protein quality control for misfolded or incompletely synthesized proteins [GO:0006515]	ATP binding [GO:0005524]; ATP hydrolysis activity [GO:0016887]; ATP-dependent peptidase activity [GO:0004176]; sequence-specific DNA binding [GO:0043565]; serine-type endopeptidase activity [GO:0004252]	cytoplasm [GO:0005737]
O86028	NA	cobalamin binding [GO:0031419]; metal ion binding [GO:0046872]; methylmalonyl-CoA mutase activity [GO:0004494]	NA
O86034	NA	3-hydroxybutyrate dehydrogenase activity [GO:0003858]	NA
O86459	biosynthetic process [GO:0009058]	glutamate-prephenate aminotransferase activity [GO:0033854]; L-aspartate:2-oxoglutarate aminotransferase activity [GO:0004069]; pyridoxal phosphate binding [GO:0030170]	cytoplasm [GO:0005737]
O87320	biosynthetic process [GO:0009058]	pyridoxal phosphate binding [GO:0030170]; transaminase activity [GO:0008483]	cytoplasm [GO:0005737]
O87391	NA	oxidoreductase activity [GO:0016491]	NA
O87392	glutamate biosynthetic process [GO:0006537]	glutamate synthase activity [GO:0015930]	NA
P02348	chromosome condensation [GO:0030261]	DNA binding [GO:0003677]	NA
P04338	NA	acyltransferase activity [GO:0016746]	cytosol [GO:0005829]
P04339	carbohydrate metabolic process [GO:0005975]	hydrolase activity, acting on carbon-nitrogen (but not peptide) bonds [GO:0016810]; metal ion binding [GO:0046872]	cytoplasm [GO:0005737]
P04683	fatty acid biosynthetic process [GO:0006633]	3-oxoacyl-[acyl-carrier-protein] synthase activity [GO:0004315]	integral component of membrane [GO:0016021]; plasma membrane [GO:0005886]
P08632	NA	acetyltransferase activity [GO:0016407]	NA
P08633	carbohydrate derivative biosynthetic process [GO:1901137]; carbohydrate metabolic process [GO:0005975]; glutamine metabolic process [GO:0006541]	carbohydrate derivative binding [GO:0097367]; glutamine-fructose-6-phosphate transaminase (isomerizing) activity [GO:0004360]	cytoplasm [GO:0005737]
P09826	glutamine biosynthetic process [GO:0006542]; nitrogen fixation [GO:0009399]	ATP binding [GO:0005524]; glutamate-ammonia ligase activity [GO:0004356]; metal ion binding [GO:0046872]	cytoplasm [GO:0005737]
P0A2W5	fatty acid biosynthetic process [GO:0006633]; Kdo2-lipid A biosynthetic process [GO:0036104]; lipid A biosynthetic process [GO:0009245]	NA	cytoplasm [GO:0005737]
P0A4T6	3,4-dihydroxybenzoate catabolic process [GO:0019619]; positive regulation of transcription, DNA-templated [GO:0045893]	DNA binding [GO:0003677]; DNA-binding transcription factor activity [GO:0003700]	NA
P10046	phosphorelay signal transduction system [GO:0000160]; regulation of transcription, DNA-templated [GO:0006355]	ATP binding [GO:0005524]; sequence-specific DNA binding [GO:0043565]	cytoplasm [GO:0005737]
P10497	inositol phosphate dephosphorylation [GO:0046855]; phosphatidylinositol phosphate biosynthetic process [GO:0046854]; polysaccharide biosynthetic process [GO:0000271]	NA	NA
P10577	nitrogen fixation [GO:0009399]; regulation of nitrogen utilization [GO:0006808]; regulation of transcription, DNA-templated [GO:0006355]	ATP binding [GO:0005524]; phosphorelay response regulator activity [GO:0000156]; sequence-specific DNA binding [GO:0043565]	cytoplasm [GO:0005737]
P12622	negative regulation of translational elongation [GO:0045900]	ATP binding [GO:0005524]	NA
P14129	translation [GO:0006412]	RNA binding [GO:0003723]; structural constituent of ribosome [GO:0003735]	ribosome [GO:0005840]
P15395	glutamine metabolic process [GO:0006541]; tryptophan biosynthetic process [GO:0000162]	anthranilate synthase activity [GO:0004049]	NA
P16556	NA	DNA binding [GO:0003677]; DNA-binding transcription factor activity [GO:0003700]	NA
P19066	nitrogen fixation [GO:0009399]	ATP binding [GO:0005524]; carbonyl sulfide nitrogenase activity [GO:0018697]; iron-sulfur cluster binding [GO:0051536]; metal ion binding [GO:0046872]; nitrogenase activity [GO:0016163]	molybdenum-iron nitrogenase complex [GO:0016612]
P19067	nitrogen fixation [GO:0009399]	ATP binding [GO:0005524]; carbonyl sulfide nitrogenase activity [GO:0018697]; iron-sulfur cluster binding [GO:0051536]; metal ion binding [GO:0046872]; nitrogenase activity [GO:0016163]	molybdenum-iron nitrogenase complex [GO:0016612]
P20471	carbohydrate metabolic process [GO:0005975]	carbohydrate binding [GO:0030246]; glycosyltransferase activity [GO:0016757]	integral component of membrane [GO:0016021]; plasma membrane [GO:0005886]
P21639	cobalamin biosynthetic process [GO:0009236]; methylation [GO:0032259]	precorrin-2 C20-methyltransferase activity [GO:0030788]	NA
P25885	transmembrane transport [GO:0055085]	ATP binding [GO:0005524]	ATP-binding cassette (ABC) transporter complex [GO:0043190]
P29930	cobalamin biosynthetic process [GO:0009236]; porphyrin-containing compound biosynthetic process [GO:0006779]	ATP binding [GO:0005524]; cob(I)yrinic acid a,c-diamide adenosyltransferase activity [GO:0008817]	cytoplasm [GO:0005737]
P29933	cobalamin biosynthetic process [GO:0009236]; porphyrin-containing compound biosynthetic process [GO:0006779]	ATP binding [GO:0005524]; ATP hydrolysis activity [GO:0016887]; cobaltochelatase activity [GO:0051116]	cytoplasm [GO:0005737]
P29937	cobalamin biosynthetic process [GO:0009236]; porphyrin-containing compound biosynthetic process [GO:0006779]	ATP binding [GO:0005524]	NA
P29944	NA	NA	NA
P30327	division septum assembly [GO:0000917]; FtsZ-dependent cytokinesis [GO:0043093]; protein polymerization [GO:0051258]	GTP binding [GO:0005525]; GTPase activity [GO:0003924]	cell division site [GO:0032153]; cytoplasm [GO:0005737]
P31592	glutamine biosynthetic process [GO:0006542]; nitrogen fixation [GO:0009399]	ATP binding [GO:0005524]; glutamate-ammonia ligase activity [GO:0004356]; metal ion binding [GO:0046872]	NA
P35473	protein folding [GO:0006457]	ATP binding [GO:0005524]; ATP hydrolysis activity [GO:0016887]	cytoplasm [GO:0005737]
P35474	protein folding [GO:0006457]	ATP binding [GO:0005524]; ATP hydrolysis activity [GO:0016887]	cytoplasm [GO:0005737]
P42719	'de novo' UMP biosynthetic process [GO:0044205]	magnesium ion binding [GO:0000287]; orotate phosphoribosyltransferase activity [GO:0004588]	NA
P42720	NA	ATP binding [GO:0005524]; fructokinase activity [GO:0008865]	NA
P49308	NA	NA	periplasmic space [GO:0042597]
P49989	DNA-templated transcription, initiation [GO:0006352]; nitrogen fixation [GO:0009399]	DNA binding [GO:0003677]; DNA-binding transcription activator activity [GO:0001216]; DNA-directed 5'-3' RNA polymerase activity [GO:0003899]; sigma factor activity [GO:0016987]	NA
P50174	poly-hydroxybutyrate biosynthetic process [GO:0042619]	acetyl-CoA C-acetyltransferase activity [GO:0003985]	cytoplasm [GO:0005737]
P50205	poly-hydroxybutyrate biosynthetic process [GO:0042619]	acetoacetyl-CoA reductase activity [GO:0018454]	cytoplasm [GO:0005737]
P50350	phosphorelay signal transduction system [GO:0000160]; polysaccharide biosynthetic process [GO:0000271]; positive regulation of transcription, DNA-templated [GO:0045893]	DNA-binding transcription activator activity [GO:0001216]; metal ion binding [GO:0046872]; transcription cis-regulatory region binding [GO:0000976]	cytoplasm [GO:0005737]; protein-DNA complex [GO:0032993]
P50507	DNA-templated transcription, initiation [GO:0006352]; response to heat [GO:0009408]	DNA binding [GO:0003677]; sigma factor activity [GO:0016987]	cytoplasm [GO:0005737]
P54082	chemotaxis [GO:0006935]	NA	periplasmic space [GO:0042597]
P55353	'de novo' GDP-L-fucose biosynthetic process [GO:0042351]	GDP-L-fucose synthase activity [GO:0050577]; isomerase activity [GO:0016853]; NADP+ binding [GO:0070401]	NA
P55354	'de novo' GDP-L-fucose biosynthetic process [GO:0042351]; GDP-mannose metabolic process [GO:0019673]	GDP-mannose 4,6-dehydratase activity [GO:0008446]; NADP+ binding [GO:0070401]	NA
P55439	chemotaxis [GO:0006935]; signal transduction [GO:0007165]	NA	integral component of membrane [GO:0016021]; plasma membrane [GO:0005886]
P55562	NA	NA	NA
P55651	NA	NA	NA
P55653	gamma-aminobutyric acid catabolic process [GO:0009450]	succinate-semialdehyde dehydrogenase (NADP+) activity [GO:0036243]	NA
P56898	DNA recombination [GO:0006310]; DNA repair [GO:0006281]; DNA replication [GO:0006260]	single-stranded DNA binding [GO:0003697]	NA
P56909	NA	2 iron, 2 sulfur cluster binding [GO:0051537]; metal ion binding [GO:0046872]; oxidoreductase activity [GO:0016491]; quinone binding [GO:0048038]	NA
P56912	NA	4 iron, 4 sulfur cluster binding [GO:0051539]; FMN binding [GO:0010181]; metal ion binding [GO:0046872]; NAD binding [GO:0051287]; NADH dehydrogenase (ubiquinone) activity [GO:0008137]; quinone binding [GO:0048038]	NA
P58380	fatty acid biosynthetic process [GO:0006633]	enoyl-[acyl-carrier-protein] reductase (NADH) activity [GO:0004318]; enoyl-[acyl-carrier-protein] reductase activity [GO:0016631]	plasma membrane [GO:0005886]
P58381	fatty acid biosynthetic process [GO:0006633]	enoyl-[acyl-carrier-protein] reductase (NADH) activity [GO:0004318]; enoyl-[acyl-carrier-protein] reductase activity [GO:0016631]	plasma membrane [GO:0005886]
P58795	NA	flavin adenine dinucleotide binding [GO:0050660]; FMN binding [GO:0010181]; NAD binding [GO:0051287]; NADH dehydrogenase (quinone) activity [GO:0050136]; NADP binding [GO:0050661]; NADPH dehydrogenase (quinone) activity [GO:0008753]	NA
P58799	histidine biosynthetic process [GO:0000105]	imidazoleglycerol-phosphate synthase activity [GO:0000107]; lyase activity [GO:0016829]	cytoplasm [GO:0005737]
P72287	ion transport [GO:0006811]; oxidative phosphorylation [GO:0006119]	electron transfer activity [GO:0009055]; heme binding [GO:0020037]; iron ion binding [GO:0005506]	integral component of membrane [GO:0016021]; plasma membrane [GO:0005886]; respirasome [GO:0070469]
P72332	fatty acid biosynthetic process [GO:0006633]	3-oxoacyl-[acyl-carrier-protein] reductase (NADPH) activity [GO:0004316]; NAD binding [GO:0051287]	NA
P77935	'de novo' IMP biosynthetic process [GO:0006189]; glutamine metabolic process [GO:0006541]; purine nucleobase biosynthetic process [GO:0009113]	amidophosphoribosyltransferase activity [GO:0004044]	NA
P95629	proline biosynthetic process [GO:0006561]; proline catabolic process to glutamate [GO:0010133]	1-pyrroline-5-carboxylate dehydrogenase activity [GO:0003842]; DNA binding [GO:0003677]; DNA-binding transcription factor activity [GO:0003700]; oxidoreductase activity, acting on the aldehyde or oxo group of donors, NAD or NADP as acceptor [GO:0016620]; proline dehydrogenase activity [GO:0004657]	NA
Q01857	dicarboxylic acid transport [GO:0006835]	symporter activity [GO:0015293]	integral component of membrane [GO:0016021]; plasma membrane [GO:0005886]
Q02154	glutamine biosynthetic process [GO:0006542]; nitrogen fixation [GO:0009399]	ATP binding [GO:0005524]; glutamate-ammonia ligase activity [GO:0004356]; metal ion binding [GO:0046872]	cytoplasm [GO:0005737]
Q03313	NA	NA	NA
Q03315	NA	NA	periplasmic space [GO:0042597]
Q03842	NA	structural molecule activity [GO:0005198]	bacterial-type flagellum [GO:0009288]; extracellular region [GO:0005576]
Q05811	ion transport [GO:0006811]	porin activity [GO:0015288]	cell outer membrane [GO:0009279]; pore complex [GO:0046930]
Q1M3A7	glycogen biosynthetic process [GO:0005978]	1,4-alpha-glucan branching enzyme activity [GO:0003844]; 1,4-alpha-glucan branching enzyme activity (using a glucosylated glycogenin as primer for glycogen synthesis) [GO:0102752]; cation binding [GO:0043169]; hydrolase activity, hydrolyzing O-glycosyl compounds [GO:0004553]	NA
Q1M3H2	protein refolding [GO:0042026]	ATP binding [GO:0005524]; ATP hydrolysis activity [GO:0016887]; isomerase activity [GO:0016853]; unfolded protein binding [GO:0051082]	cytoplasm [GO:0005737]
Q1M498	hydrogen peroxide catabolic process [GO:0042744]; response to oxidative stress [GO:0006979]	catalase activity [GO:0004096]; heme binding [GO:0020037]; metal ion binding [GO:0046872]	NA
Q1M5U3	thiamine biosynthetic process [GO:0009228]; thiamine diphosphate biosynthetic process [GO:0009229]	ATP binding [GO:0005524]; hydroxyethylthiazole kinase activity [GO:0004417]; magnesium ion binding [GO:0000287]	NA
Q1M755	NA	metal ion binding [GO:0046872]	extracellular region [GO:0005576]
Q1M7A0	phosphorelay signal transduction system [GO:0000160]; regulation of transcription, DNA-templated [GO:0006355]	DNA binding [GO:0003677]	cytoplasm [GO:0005737]
Q1M7A2	amino acid transport [GO:0006865]	transmembrane transporter activity [GO:0022857]	integral component of membrane [GO:0016021]; plasma membrane [GO:0005886]
Q1M901	adenine catabolic process [GO:0006146]	adenine deaminase activity [GO:0000034]	NA
Q1MA15	protoporphyrinogen IX biosynthetic process [GO:0006782]	uroporphyrinogen decarboxylase activity [GO:0004853]	cytoplasm [GO:0005737]
Q1MA25	leucyl-tRNA aminoacylation [GO:0006429]	aminoacyl-tRNA editing activity [GO:0002161]; ATP binding [GO:0005524]; leucine-tRNA ligase activity [GO:0004823]	cytoplasm [GO:0005737]
Q1MA35	'de novo' IMP biosynthetic process [GO:0006189]	IMP cyclohydrolase activity [GO:0003937]; phosphoribosylaminoimidazolecarboxamide formyltransferase activity [GO:0004643]	NA
Q1MA50	leucine biosynthetic process [GO:0009098]	3-isopropylmalate dehydrogenase activity [GO:0003862]; magnesium ion binding [GO:0000287]; NAD binding [GO:0051287]	cytoplasm [GO:0005737]
Q1MA52	leucine biosynthetic process [GO:0009098]	3-isopropylmalate dehydratase activity [GO:0003861]	3-isopropylmalate dehydratase complex [GO:0009316]
Q1MA67	NA	rRNA (pseudouridine-N3-)-methyltransferase activity [GO:0070038]	cytoplasm [GO:0005737]
Q1MA76	ribosome biogenesis [GO:0042254]	GTP binding [GO:0005525]; GTPase activity [GO:0003924]; magnesium ion binding [GO:0000287]	cytoplasm [GO:0005737]
Q1MAA2	NA	ABC-type D-ribose transporter activity [GO:0015611]; ATP binding [GO:0005524]	plasma membrane [GO:0005886]
Q1MAD1	translation [GO:0006412]	structural constituent of ribosome [GO:0003735]	large ribosomal subunit [GO:0015934]
Q1MAF5	NA	translation elongation factor activity [GO:0003746]	cytoplasm [GO:0005737]
Q1MAJ9	leucine biosynthetic process [GO:0009098]	3-isopropylmalate dehydratase activity [GO:0003861]; 4 iron, 4 sulfur cluster binding [GO:0051539]; metal ion binding [GO:0046872]	NA
Q1MAK3	NA	tRNA (guanine(37)-N(1))-methyltransferase activity [GO:0052906]	cytoplasm [GO:0005737]
Q1MAK5	translation [GO:0006412]	structural constituent of ribosome [GO:0003735]	ribosome [GO:0005840]
Q1MAN9	arginine biosynthetic process [GO:0006526]	argininosuccinate synthase activity [GO:0004055]; ATP binding [GO:0005524]	cytoplasm [GO:0005737]
Q1MAQ8	tRNA threonylcarbamoyladenosine modification [GO:0002949]	iron ion binding [GO:0005506]; N(6)-L-threonylcarbamoyladenine synthase activity [GO:0061711]	cytoplasm [GO:0005737]
Q1MAQ9	carbohydrate metabolic process [GO:0005975]; glycerol-3-phosphate biosynthetic process [GO:0046167]; glycerol-3-phosphate catabolic process [GO:0046168]; glycerophospholipid metabolic process [GO:0006650]; phospholipid biosynthetic process [GO:0008654]	glycerol-3-phosphate dehydrogenase [NAD+] activity [GO:0004367]; glycerol-3-phosphate dehydrogenase [NADP+] activity [GO:0106257]; NAD binding [GO:0051287]	glycerol-3-phosphate dehydrogenase complex [GO:0009331]
Q1MAZ1	plasma membrane ATP synthesis coupled proton transport [GO:0042777]	ATP binding [GO:0005524]; proton-transporting ATP synthase activity, rotational mechanism [GO:0046933]	plasma membrane [GO:0005886]; proton-transporting ATP synthase complex, catalytic core F(1) [GO:0045261]
Q1MAZ2	NA	ATP binding [GO:0005524]; proton-transporting ATP synthase activity, rotational mechanism [GO:0046933]; proton-transporting ATPase activity, rotational mechanism [GO:0046961]	plasma membrane [GO:0005886]; proton-transporting ATP synthase complex, catalytic core F(1) [GO:0045261]
Q1MAZ3	NA	ATP binding [GO:0005524]; proton-transporting ATP synthase activity, rotational mechanism [GO:0046933]	plasma membrane [GO:0005886]; proton-transporting ATP synthase complex, catalytic core F(1) [GO:0045261]
Q1MB26	isopentenyl diphosphate biosynthetic process, methylerythritol 4-phosphate pathway [GO:0019288]; terpenoid biosynthetic process [GO:0016114]	1-deoxy-D-xylulose-5-phosphate reductoisomerase activity [GO:0030604]; metal ion binding [GO:0046872]; NADPH binding [GO:0070402]	NA
Q1MB43	fatty acid biosynthetic process [GO:0006633]; malonyl-CoA biosynthetic process [GO:2001295]	acetyl-CoA carboxylase activity [GO:0003989]; ATP binding [GO:0005524]; carboxyl- or carbamoyltransferase activity [GO:0016743]	acetyl-CoA carboxylase complex [GO:0009317]
Q1MB56	methylglyoxal catabolic process to D-lactate via S-lactoyl-glutathione [GO:0019243]	hydroxyacylglutathione hydrolase activity [GO:0004416]; metal ion binding [GO:0046872]	NA
Q1MB73	arginine biosynthetic process via ornithine [GO:0042450]	argininosuccinate lyase activity [GO:0004056]	cytoplasm [GO:0005737]
Q1MB97	intracellular protein transmembrane transport [GO:0065002]; protein import [GO:0017038]; protein targeting [GO:0006605]	ATP binding [GO:0005524]; metal ion binding [GO:0046872]; protein-exporting ATPase activity [GO:0008564]	cytoplasm [GO:0005737]; plasma membrane [GO:0005886]
Q1MBK9	lysyl-tRNA aminoacylation [GO:0006430]	ATP binding [GO:0005524]; lysine-tRNA ligase activity [GO:0004824]; magnesium ion binding [GO:0000287]; nucleic acid binding [GO:0003676]	cytoplasm [GO:0005737]
Q1MBL0	glutamyl-tRNA aminoacylation [GO:0006424]	ATP binding [GO:0005524]; glutamate-tRNA ligase activity [GO:0004818]; tRNA binding [GO:0000049]; zinc ion binding [GO:0008270]	cytoplasm [GO:0005737]
Q1MBL8	D-xylose metabolic process [GO:0042732]	magnesium ion binding [GO:0000287]; xylose isomerase activity [GO:0009045]	cytoplasm [GO:0005737]
Q1MBS7	glycogen biosynthetic process [GO:0005978]	alpha-1,4-glucan synthase activity [GO:0033201]; glycogen (starch) synthase activity [GO:0004373]; starch synthase activity [GO:0009011]	NA
Q1MBS8	glycogen biosynthetic process [GO:0005978]	ATP binding [GO:0005524]; glucose-1-phosphate adenylyltransferase activity [GO:0008878]	NA
Q1MBS9	glycogen biosynthetic process [GO:0005978]	1,4-alpha-glucan branching enzyme activity [GO:0003844]; 1,4-alpha-glucan branching enzyme activity (using a glucosylated glycogenin as primer for glycogen synthesis) [GO:0102752]; cation binding [GO:0043169]; hydrolase activity, hydrolyzing O-glycosyl compounds [GO:0004553]	NA
Q1MC25	translation [GO:0006412]	rRNA binding [GO:0019843]; structural constituent of ribosome [GO:0003735]	ribosome [GO:0005840]
Q1MC31	glycolytic process [GO:0006096]	ATP binding [GO:0005524]; phosphoglycerate kinase activity [GO:0004618]	cytoplasm [GO:0005737]
Q1MC52	DNA recombination [GO:0006310]; DNA repair [GO:0006281]; SOS response [GO:0009432]	ATP binding [GO:0005524]; ATP hydrolysis activity [GO:0016887]; DNA binding [GO:0003677]; four-way junction helicase activity [GO:0009378]	NA
Q1MC59	regulation of transcription, DNA-templated [GO:0006355]	DNA binding [GO:0003677]	cytoplasm [GO:0005737]
Q1MC72	cell cycle [GO:0007049]; cell division [GO:0051301]; protein import [GO:0017038]	NA	periplasmic space [GO:0042597]
Q1MC77	carbohydrate metabolic process [GO:0005975]	magnesium ion binding [GO:0000287]; phosphoglucosamine mutase activity [GO:0008966]	NA
Q1MCV4	nitrogen compound metabolic process [GO:0006807]	nickel cation binding [GO:0016151]	cytoplasm [GO:0005737]
Q1MCV5	urea catabolic process [GO:0043419]	nickel cation binding [GO:0016151]; urease activity [GO:0009039]	cytoplasm [GO:0005737]
Q1MCV6	urea catabolic process [GO:0043419]	urease activity [GO:0009039]	urease complex [GO:0035550]
Q1MCV9	urea catabolic process [GO:0043419]	nickel cation binding [GO:0016151]; urease activity [GO:0009039]	cytoplasm [GO:0005737]
Q1MCW2	protein folding [GO:0006457]; protein-containing complex assembly [GO:0065003]; urea metabolic process [GO:0019627]	nickel cation binding [GO:0016151]; unfolded protein binding [GO:0051082]	cytoplasm [GO:0005737]
Q1MDE8	adenine catabolic process [GO:0006146]	adenine deaminase activity [GO:0000034]	NA
Q1MDE9	amino acid import [GO:0043090]; branched-chain amino acid transport [GO:0015803]; isoleucine transport [GO:0015818]; leucine transport [GO:0015820]; valine transport [GO:0015829]	NA	ATP-binding cassette (ABC) transporter complex, substrate-binding subunit-containing [GO:0055052]; periplasmic space [GO:0042597]
Q1MDG4	tetrahydrofolate interconversion [GO:0035999]	ATP binding [GO:0005524]; formate-tetrahydrofolate ligase activity [GO:0004329]	NA
Q1MDH4	NA	ATP-dependent peptidase activity [GO:0004176]; serine-type endopeptidase activity [GO:0004252]	cytoplasm [GO:0005737]
Q1MDH6	leucine biosynthetic process [GO:0009098]	2-isopropylmalate synthase activity [GO:0003852]	NA
Q1MDJ5	protoporphyrinogen IX biosynthetic process [GO:0006782]	coproporphyrinogen oxidase activity [GO:0004109]; metal ion binding [GO:0046872]; protein homodimerization activity [GO:0042803]	cytoplasm [GO:0005737]
Q1MDR7	regulation of DNA-templated transcription, elongation [GO:0032784]	DNA binding [GO:0003677]; RNA polymerase binding [GO:0070063]	NA
Q1MDT5	L-threonine catabolic process to glycine [GO:0019518]	L-threonine 3-dehydrogenase activity [GO:0008743]; zinc ion binding [GO:0008270]	cytoplasm [GO:0005737]
Q1ME24	NA	DNA binding [GO:0003677]; DNA-binding transcription factor activity [GO:0003700]	cytoplasm [GO:0005737]; nucleoid [GO:0009295]
Q1ME25	rRNA base methylation [GO:0070475]	rRNA (cytosine-N4-)-methyltransferase activity [GO:0071424]	cytoplasm [GO:0005737]
Q1ME31	cell cycle [GO:0007049]; cell division [GO:0051301]; cell wall organization [GO:0071555]; peptidoglycan biosynthetic process [GO:0009252]; regulation of cell shape [GO:0008360]	ATP binding [GO:0005524]; tetrahydrofolylpolyglutamate synthase activity [GO:0004326]; UDP-N-acetylmuramoylalanine-D-glutamate ligase activity [GO:0008764]	cytoplasm [GO:0005737]
Q1ME33	carbohydrate metabolic process [GO:0005975]; cell cycle [GO:0007049]; cell division [GO:0051301]; cell wall organization [GO:0071555]; lipid glycosylation [GO:0030259]; peptidoglycan biosynthetic process [GO:0009252]; regulation of cell shape [GO:0008360]	UDP-N-acetyl-D-glucosamine:N-acetylmuramoyl-L-alanyl-D-glutamyl-meso-2,6-diaminopimelyl-D-alanyl-D-alanine-diphosphoundecaprenol 4-beta-N-acetylglucosaminlytransferase activity [GO:0051991]; undecaprenyldiphospho-muramoylpentapeptide beta-N-acetylglucosaminyltransferase activity [GO:0050511]	plasma membrane [GO:0005886]
Q1ME34	cell cycle [GO:0007049]; cell division [GO:0051301]; cell wall organization [GO:0071555]; peptidoglycan biosynthetic process [GO:0009252]; regulation of cell shape [GO:0008360]	ATP binding [GO:0005524]; UDP-N-acetylmuramate-L-alanine ligase activity [GO:0008763]	cytoplasm [GO:0005737]
Q1ME35	cell cycle [GO:0007049]; cell division [GO:0051301]; cell wall organization [GO:0071555]; peptidoglycan biosynthetic process [GO:0009252]; regulation of cell shape [GO:0008360]	FAD binding [GO:0071949]; UDP-N-acetylmuramate dehydrogenase activity [GO:0008762]	cytoplasm [GO:0005737]
Q1ME47	DNA repair [GO:0006281]; DNA replication [GO:0006260]	DNA binding [GO:0003677]; DNA ligase (NAD+) activity [GO:0003911]; metal ion binding [GO:0046872]	NA
Q1ME53	NA	protein methyltransferase activity [GO:0008276]	cytoplasm [GO:0005737]
Q1ME82	dTMP biosynthetic process [GO:0006231]; dTTP biosynthetic process [GO:0006235]; methylation [GO:0032259]	thymidylate synthase activity [GO:0004799]	cytoplasm [GO:0005737]
Q1ME89	tRNA processing [GO:0008033]	ATP binding [GO:0005524]; tRNA dimethylallyltransferase activity [GO:0052381]	NA
Q1MEX2	NA	potassium ion transmembrane transporter activity [GO:0015079]	integral component of membrane [GO:0016021]; plasma membrane [GO:0005886]
Q1MFK4	cobalamin biosynthetic process [GO:0009236]	nicotinate-nucleotide-dimethylbenzimidazole phosphoribosyltransferase activity [GO:0008939]	NA
Q1MFT6	pentose-phosphate shunt, non-oxidative branch [GO:0009052]	ribose-5-phosphate isomerase activity [GO:0004751]	NA
Q1MFZ6	nucleobase catabolic process [GO:0046113]	hydrolase activity, acting on glycosyl bonds [GO:0016798]; metal ion binding [GO:0046872]; pseudouridylate synthase activity [GO:0004730]	NA
Q1MFZ8	DNA recombination [GO:0006310]; DNA repair [GO:0006281]; SOS response [GO:0009432]	ATP binding [GO:0005524]; ATP-dependent activity, acting on DNA [GO:0008094]; damaged DNA binding [GO:0003684]; single-stranded DNA binding [GO:0003697]	cytoplasm [GO:0005737]
Q1MFZ9	alanyl-tRNA aminoacylation [GO:0006419]	alanine-tRNA ligase activity [GO:0004813]; ATP binding [GO:0005524]; tRNA binding [GO:0000049]; zinc ion binding [GO:0008270]	cytoplasm [GO:0005737]
Q1MG12	glutamine metabolic process [GO:0006541]	glutaminase activity [GO:0004359]	NA
Q1MG23	'de novo' IMP biosynthetic process [GO:0006189]	ATP binding [GO:0005524]; magnesium ion binding [GO:0000287]; phosphoribosylformylglycinamidine synthase activity [GO:0004642]	cytoplasm [GO:0005737]
Q1MG27	'de novo' IMP biosynthetic process [GO:0006189]; glutamine metabolic process [GO:0006541]	ATP binding [GO:0005524]; glutaminase activity [GO:0004359]; phosphoribosylformylglycinamidine synthase activity [GO:0004642]	cytoplasm [GO:0005737]
Q1MG48	1,6-anhydro-N-acetyl-beta-muramic acid catabolic process [GO:0097175]; amino sugar metabolic process [GO:0006040]; carbohydrate metabolic process [GO:0005975]; peptidoglycan turnover [GO:0009254]	ATP binding [GO:0005524]; kinase activity [GO:0016301]; phosphotransferase activity, alcohol group as acceptor [GO:0016773]	NA
Q1MGA3	histidine biosynthetic process [GO:0000105]	magnesium ion binding [GO:0000287]; phosphoribosyl-AMP cyclohydrolase activity [GO:0004635]; zinc ion binding [GO:0008270]	cytoplasm [GO:0005737]
Q1MGA7	threonyl-tRNA aminoacylation [GO:0006435]	ATP binding [GO:0005524]; metal ion binding [GO:0046872]; threonine-tRNA ligase activity [GO:0004829]; tRNA binding [GO:0000049]	cytoplasm [GO:0005737]
Q1MGC4	'de novo' CTP biosynthetic process [GO:0044210]; glutamine metabolic process [GO:0006541]	ATP binding [GO:0005524]; CTP synthase activity [GO:0003883]; metal ion binding [GO:0046872]	NA
Q1MGE2	tryptophan biosynthetic process [GO:0000162]	anthranilate phosphoribosyltransferase activity [GO:0004048]; magnesium ion binding [GO:0000287]	NA
Q1MGM6	coenzyme A biosynthetic process [GO:0015937]	ATP binding [GO:0005524]; pantetheine-phosphate adenylyltransferase activity [GO:0004595]	cytoplasm [GO:0005737]
Q1MGP8	cell morphogenesis [GO:0000902]; cell wall organization [GO:0071555]; lipid A biosynthetic process [GO:0009245]; peptidoglycan biosynthetic process [GO:0009252]; regulation of cell shape [GO:0008360]; UDP-N-acetylglucosamine biosynthetic process [GO:0006048]	glucosamine-1-phosphate N-acetyltransferase activity [GO:0019134]; magnesium ion binding [GO:0000287]; UDP-N-acetylglucosamine diphosphorylase activity [GO:0003977]	cytoplasm [GO:0005737]
Q1MGZ1	regulation of transcription, DNA-templated [GO:0006355]	RNA binding [GO:0003723]	NA
Q1MH21	isopentenyl diphosphate biosynthetic process, methylerythritol 4-phosphate pathway [GO:0019288]; terpenoid biosynthetic process [GO:0016114]	2-C-methyl-D-erythritol 2,4-cyclodiphosphate synthase activity [GO:0008685]; 2-C-methyl-D-erythritol 4-phosphate cytidylyltransferase activity [GO:0050518]; metal ion binding [GO:0046872]	NA
Q1MH44	lipid A biosynthetic process [GO:0009245]	acyl-[acyl-carrier-protein]-UDP-N-acetylglucosamine O-acyltransferase activity [GO:0008780]	cytoplasm [GO:0005737]
Q1MH45	fatty acid biosynthetic process [GO:0006633]; lipid A biosynthetic process [GO:0009245]	(3R)-hydroxymyristoyl-[acyl-carrier-protein] dehydratase activity [GO:0008659]; 3-hydroxydecanoyl-[acyl-carrier-protein] dehydratase activity [GO:0008693]; 3-hydroxyoctanoyl-[acyl-carrier-protein] dehydratase activity [GO:0047451]; 3-hydroxypalmitoyl-[acyl-carrier-protein] dehydratase activity [GO:0004317]	cytoplasm [GO:0005737]
Q1MH46	lipid A biosynthetic process [GO:0009245]	N-acyltransferase activity [GO:0016410]	NA
Q1MH51	translational termination [GO:0006415]	NA	cytoplasm [GO:0005737]
Q1MH52	'de novo' CTP biosynthetic process [GO:0044210]	ATP binding [GO:0005524]; UMP kinase activity [GO:0033862]	cytoplasm [GO:0005737]
Q1MHI9	translation [GO:0006412]	asparaginyl-tRNA synthase (glutamine-hydrolyzing) activity [GO:0050566]; ATP binding [GO:0005524]; glutaminyl-tRNA synthase (glutamine-hydrolyzing) activity [GO:0050567]	NA
Q1MHJ7	NA	hydrolase activity [GO:0016787]	NA
Q1MHJ8	rRNA 5'-end processing [GO:0000967]	nuclease activity [GO:0004518]	cytoplasm [GO:0005737]
Q1MHK9	cell cycle [GO:0007049]; cell division [GO:0051301]; protein folding [GO:0006457]; protein transport [GO:0015031]	peptidyl-prolyl cis-trans isomerase activity [GO:0003755]	cytoplasm [GO:0005737]
Q1MHL2	NA	5,10-methylenetetrahydrofolate-dependent tRNA (m5U54) methyltransferase activity [GO:0030698]; flavin adenine dinucleotide binding [GO:0050660]; methylenetetrahydrofolate-tRNA-(uracil-5-)-methyltransferase (FADH2-oxidizing) activity [GO:0047151]	cytoplasm [GO:0005737]
Q1MHM2	selenocysteine biosynthetic process [GO:0016260]; selenocysteinyl-tRNA(Sec) biosynthetic process [GO:0097056]; seryl-tRNA aminoacylation [GO:0006434]	ATP binding [GO:0005524]; serine-tRNA ligase activity [GO:0004828]	cytoplasm [GO:0005737]
Q1MHN1	NA	triphosphoric monoester hydrolase activity [GO:0016793]	NA
Q1MHV8	NA	electron transfer activity [GO:0009055]; FMN binding [GO:0010181]; oxidoreductase activity, acting on NAD(P)H, NAD(P) as acceptor [GO:0016652]; oxidoreductase activity, acting on NAD(P)H, quinone or similar compound as acceptor [GO:0016655]	NA
Q1MI52	L-phenylalanine catabolic process [GO:0006559]; tyrosine catabolic process [GO:0006572]	homogentisate 1,2-dioxygenase activity [GO:0004411]; iron ion binding [GO:0005506]	NA
Q1MIB2	isoleucine biosynthetic process [GO:0009097]; valine biosynthetic process [GO:0009099]	4 iron, 4 sulfur cluster binding [GO:0051539]; dihydroxy-acid dehydratase activity [GO:0004160]; metal ion binding [GO:0046872]	NA
Q1MIB6	translation [GO:0006412]	structural constituent of ribosome [GO:0003735]	ribosome [GO:0005840]
Q1MIC2	translation [GO:0006412]	rRNA binding [GO:0019843]; structural constituent of ribosome [GO:0003735]	large ribosomal subunit [GO:0015934]
Q1MIC3	translation [GO:0006412]	structural constituent of ribosome [GO:0003735]	large ribosomal subunit [GO:0015934]
Q1MIC5	translation [GO:0006412]	rRNA binding [GO:0019843]; structural constituent of ribosome [GO:0003735]	ribosome [GO:0005840]
Q1MID0	translation [GO:0006412]	rRNA binding [GO:0019843]; structural constituent of ribosome [GO:0003735]	ribosome [GO:0005840]
Q1MID1	translation [GO:0006412]	rRNA binding [GO:0019843]; structural constituent of ribosome [GO:0003735]	large ribosomal subunit [GO:0015934]
Q1MID3	translation [GO:0006412]	structural constituent of ribosome [GO:0003735]	ribosome [GO:0005840]
Q1MID5	translation [GO:0006412]	mRNA binding [GO:0003729]; rRNA binding [GO:0019843]; structural constituent of ribosome [GO:0003735]	ribosome [GO:0005840]
Q1MID8	translation [GO:0006412]	rRNA binding [GO:0019843]; structural constituent of ribosome [GO:0003735]; transferase activity [GO:0016740]	large ribosomal subunit [GO:0015934]
Q1MIE1	translation [GO:0006412]	rRNA binding [GO:0019843]; structural constituent of ribosome [GO:0003735]	ribosome [GO:0005840]
Q1MIE3	NA	GTP binding [GO:0005525]; GTPase activity [GO:0003924]; translation elongation factor activity [GO:0003746]	cytoplasm [GO:0005737]
Q1MIE4	NA	GTP binding [GO:0005525]; GTPase activity [GO:0003924]; translation elongation factor activity [GO:0003746]	cytoplasm [GO:0005737]
Q1MIE5	translation [GO:0006412]	rRNA binding [GO:0019843]; structural constituent of ribosome [GO:0003735]; tRNA binding [GO:0000049]	small ribosomal subunit [GO:0015935]
Q1MIE8	transcription, DNA-templated [GO:0006351]	DNA binding [GO:0003677]; DNA-directed 5'-3' RNA polymerase activity [GO:0003899]; magnesium ion binding [GO:0000287]; zinc ion binding [GO:0008270]	NA
Q1MIE9	transcription, DNA-templated [GO:0006351]	DNA binding [GO:0003677]; DNA-directed 5'-3' RNA polymerase activity [GO:0003899]; ribonucleoside binding [GO:0032549]	NA
Q1MIF0	translation [GO:0006412]	structural constituent of ribosome [GO:0003735]	ribosome [GO:0005840]
Q1MIF1	translation [GO:0006412]	large ribosomal subunit rRNA binding [GO:0070180]	ribosome [GO:0005840]
Q1MII4	translation [GO:0006412]	structural constituent of ribosome [GO:0003735]	ribosome [GO:0005840]
Q1MIJ4	lipoprotein transport [GO:0042953]	ATP binding [GO:0005524]	plasma membrane [GO:0005886]
Q1MIJ6	prolyl-tRNA aminoacylation [GO:0006433]	ATP binding [GO:0005524]; proline-tRNA ligase activity [GO:0004827]	cytoplasm [GO:0005737]
Q1MIK6	NA	4 iron, 4 sulfur cluster binding [GO:0051539]; iron ion binding [GO:0005506]; NADH dehydrogenase (quinone) activity [GO:0050136]; quinone binding [GO:0048038]	plasma membrane [GO:0005886]
Q1MIL2	NA	NAD binding [GO:0051287]; NADH dehydrogenase (quinone) activity [GO:0050136]; quinone binding [GO:0048038]	plasma membrane [GO:0005886]
Q1MIL3	NA	NADH dehydrogenase (ubiquinone) activity [GO:0008137]; quinone binding [GO:0048038]	plasma membrane [GO:0005886]
Q1MIL4	NA	4 iron, 4 sulfur cluster binding [GO:0051539]; iron ion binding [GO:0005506]; NADH dehydrogenase (ubiquinone) activity [GO:0008137]; quinone binding [GO:0048038]	plasma membrane [GO:0005886]
Q1MIM6	protein folding [GO:0006457]	ATP binding [GO:0005524]; ATP hydrolysis activity [GO:0016887]; protein dimerization activity [GO:0046983]; unfolded protein binding [GO:0051082]; zinc ion binding [GO:0008270]	NA
Q1MIM7	NA	ATP-dependent peptidase activity [GO:0004176]; serine-type endopeptidase activity [GO:0004252]	cytoplasm [GO:0005737]
Q1MIS6	fatty acid biosynthetic process [GO:0006633]	3-oxoacyl-[acyl-carrier-protein] synthase activity [GO:0004315]; beta-ketoacyl-acyl-carrier-protein synthase III activity [GO:0033818]	cytoplasm [GO:0005737]
Q1MIS7	fatty acid biosynthetic process [GO:0006633]; phospholipid biosynthetic process [GO:0008654]	phosphate:acyl-[acyl carrier protein] acyltransferase activity [GO:0043811]	cytoplasm [GO:0005737]
Q1MIU5	glycine biosynthetic process from serine [GO:0019264]; tetrahydrofolate interconversion [GO:0035999]	glycine hydroxymethyltransferase activity [GO:0004372]; pyridoxal phosphate binding [GO:0030170]	cytoplasm [GO:0005737]
Q1MIW0	aspartyl-tRNA aminoacylation [GO:0006422]	aspartate-tRNA ligase activity [GO:0004815]; aspartate-tRNA(Asn) ligase activity [GO:0050560]; ATP binding [GO:0005524]; nucleic acid binding [GO:0003676]	cytoplasm [GO:0005737]
Q1MIW9	'de novo' IMP biosynthetic process [GO:0006189]	ATP binding [GO:0005524]; phosphoribosylformylglycinamidine cyclo-ligase activity [GO:0004641]	cytoplasm [GO:0005737]
Q1MIY5	CTP biosynthetic process [GO:0006241]; GTP biosynthetic process [GO:0006183]; UTP biosynthetic process [GO:0006228]	ATP binding [GO:0005524]; metal ion binding [GO:0046872]; nucleoside diphosphate kinase activity [GO:0004550]	cytoplasm [GO:0005737]
Q1MIZ4	NA	manganese ion binding [GO:0030145]; metalloaminopeptidase activity [GO:0070006]	cytoplasm [GO:0005737]
Q1MJ01	NA	16S rRNA (adenine(1518)-N(6)/adenine(1519)-N(6))-dimethyltransferase activity [GO:0052908]; RNA binding [GO:0003723]	cytoplasm [GO:0005737]
Q1MJ06	NA	acyl carrier activity [GO:0000036]; phosphopantetheine binding [GO:0031177]	cytoplasm [GO:0005737]
Q1MJ10	translation [GO:0006412]	rRNA binding [GO:0019843]; structural constituent of ribosome [GO:0003735]	ribosome [GO:0005840]
Q1MJ11	translation [GO:0006412]	rRNA binding [GO:0019843]; structural constituent of ribosome [GO:0003735]	ribosome [GO:0005840]
Q1MJ22	cysteinyl-tRNA aminoacylation [GO:0006423]	ATP binding [GO:0005524]; cysteine-tRNA ligase activity [GO:0004817]; zinc ion binding [GO:0008270]	cytoplasm [GO:0005737]
Q1MJ32	phosphatidylethanolamine biosynthetic process [GO:0006646]	phosphatidylserine decarboxylase activity [GO:0004609]	plasma membrane [GO:0005886]
Q1MJ54	mRNA processing [GO:0006397]; rRNA catabolic process [GO:0016075]; rRNA processing [GO:0006364]; tRNA processing [GO:0008033]	metal ion binding [GO:0046872]; ribonuclease III activity [GO:0004525]; rRNA binding [GO:0019843]	cytoplasm [GO:0005737]
Q1MJ60	transcription, DNA-templated [GO:0006351]	DNA binding [GO:0003677]; DNA-directed 5'-3' RNA polymerase activity [GO:0003899]	NA
Q1MJ95	lipid glycosylation [GO:0030259]; lipopolysaccharide biosynthetic process [GO:0009103]	glycosyltransferase activity [GO:0016757]	integral component of membrane [GO:0016021]; plasma membrane [GO:0005886]
Q1MJK8	NA	ATP binding [GO:0005524]; magnesium ion binding [GO:0000287]; nucleotidyltransferase activity [GO:0016779]	NA
Q1MJR4	translation [GO:0006412]	structural constituent of ribosome [GO:0003735]	ribosome [GO:0005840]
Q1MJU3	glycine betaine biosynthetic process from choline [GO:0019285]	betaine-aldehyde dehydrogenase activity [GO:0008802]; metal ion binding [GO:0046872]	NA
Q1MJU4	glycine betaine biosynthetic process from choline [GO:0019285]	betaine-aldehyde dehydrogenase activity [GO:0008802]; choline dehydrogenase activity [GO:0008812]; flavin adenine dinucleotide binding [GO:0050660]	NA
Q1MKH3	NA	NA	NA
Q1MKH6	RNA catabolic process [GO:0006401]	magnesium ion binding [GO:0000287]; nucleic acid binding [GO:0003676]; RNA-DNA hybrid ribonuclease activity [GO:0004523]	cytoplasm [GO:0005737]
Q1MKH7	threonine biosynthetic process [GO:0009088]	ATP binding [GO:0005524]; homoserine kinase activity [GO:0004413]	NA
Q1MKK1	aromatic amino acid family biosynthetic process [GO:0009073]; cellular amino acid biosynthetic process [GO:0008652]; chorismate biosynthetic process [GO:0009423]	chorismate synthase activity [GO:0004107]	NA
Q1MKN4	1-deoxy-D-xylulose 5-phosphate biosynthetic process [GO:0052865]; terpenoid biosynthetic process [GO:0016114]; thiamine biosynthetic process [GO:0009228]	1-deoxy-D-xylulose-5-phosphate synthase activity [GO:0008661]; magnesium ion binding [GO:0000287]; thiamine pyrophosphate binding [GO:0030976]	NA
Q1MKQ6	arginyl-tRNA aminoacylation [GO:0006420]; glycyl-tRNA aminoacylation [GO:0006426]	arginine-tRNA ligase activity [GO:0004814]; ATP binding [GO:0005524]; glycine-tRNA ligase activity [GO:0004820]	cytoplasm [GO:0005737]
Q1MKT0	NA	proton-transporting ATP synthase activity, rotational mechanism [GO:0046933]	integral component of membrane [GO:0016021]; plasma membrane [GO:0005886]; proton-transporting ATP synthase complex, coupling factor F(o) [GO:0045263]
Q1MKT5	NA	potassium ion transmembrane transporter activity [GO:0015079]	integral component of membrane [GO:0016021]; plasma membrane [GO:0005886]
Q1MKU7	mismatch repair [GO:0006298]	ATP binding [GO:0005524]; ATP hydrolysis activity [GO:0016887]; mismatched DNA binding [GO:0030983]	mismatch repair complex [GO:0032300]
Q1MKX4	protein refolding [GO:0042026]	ATP binding [GO:0005524]; ATP hydrolysis activity [GO:0016887]; isomerase activity [GO:0016853]; unfolded protein binding [GO:0051082]	cytoplasm [GO:0005737]
Q1MKX9	histidine biosynthetic process [GO:0000105]	NA	cytoplasm [GO:0005737]
Q1MKY0	histidyl-tRNA aminoacylation [GO:0006427]	ATP binding [GO:0005524]; histidine-tRNA ligase activity [GO:0004821]	cytoplasm [GO:0005737]
Q1MLL4	galactitol metabolic process [GO:0019402]	galactitol 2-dehydrogenase activity [GO:0047713]	NA
Q1MLP2	nucleotide metabolic process [GO:0009117]	dTTP diphosphatase activity [GO:0036218]; NADH pyrophosphatase activity [GO:0035529]; UTP diphosphatase activity [GO:0036221]	cytoplasm [GO:0005737]
Q1MLP8	cell cycle [GO:0007049]; cell division [GO:0051301]; cell wall organization [GO:0071555]; peptidoglycan biosynthetic process [GO:0009252]; regulation of cell shape [GO:0008360]; UDP-N-acetylgalactosamine biosynthetic process [GO:0019277]	UDP-N-acetylglucosamine 1-carboxyvinyltransferase activity [GO:0008760]	cytoplasm [GO:0005737]
Q1MLV9	arginine biosynthetic process [GO:0006526]	amino acid binding [GO:0016597]; ornithine carbamoyltransferase activity [GO:0004585]	cytoplasm [GO:0005737]
Q1MLW4	NA	ATP binding [GO:0005524]; ATPase-coupled phosphate ion transmembrane transporter activity [GO:0015415]; inorganic phosphate transmembrane transporter activity [GO:0005315]	plasma membrane [GO:0005886]
Q1MM06	gluconeogenesis [GO:0006094]; glycolytic process [GO:0006096]	glucose-6-phosphate isomerase activity [GO:0004347]	cytoplasm [GO:0005737]
Q1MM58	protein transport [GO:0015031]	membrane insertase activity [GO:0032977]	integral component of membrane [GO:0016021]; plasma membrane [GO:0005886]
Q1MM59	division septum assembly [GO:0000917]	GTP binding [GO:0005525]; metal ion binding [GO:0046872]	NA
Q1MM66	arginine biosynthetic process via ornithine [GO:0042450]	acetylglutamate kinase activity [GO:0003991]; ATP binding [GO:0005524]	cytoplasm [GO:0005737]
Q1MM74	diaminopimelate biosynthetic process [GO:0019877]; lysine biosynthetic process via diaminopimelate [GO:0009089]	2,3,4,5-tetrahydropyridine-2,6-dicarboxylate N-succinyltransferase activity [GO:0008666]	cytoplasm [GO:0005737]
Q1MM75	diaminopimelate biosynthetic process [GO:0019877]; lysine biosynthetic process via diaminopimelate [GO:0009089]	cobalt ion binding [GO:0050897]; succinyl-diaminopimelate desuccinylase activity [GO:0009014]; zinc ion binding [GO:0008270]	NA
Q1MMC3	NA	tRNA (guanine-N7-)-methyltransferase activity [GO:0008176]	NA
Q1MMC9	protein folding [GO:0006457]	adenyl-nucleotide exchange factor activity [GO:0000774]; chaperone binding [GO:0051087]; protein homodimerization activity [GO:0042803]	cytoplasm [GO:0005737]
Q1MMD1	rRNA catabolic process [GO:0016075]; rRNA processing [GO:0006364]; tRNA processing [GO:0008033]	3'-5'-exoribonuclease activity [GO:0000175]; tRNA binding [GO:0000049]; tRNA nucleotidyltransferase activity [GO:0009022]	NA
Q1MMI1	'de novo' pyrimidine nucleobase biosynthetic process [GO:0006207]; 'de novo' UMP biosynthetic process [GO:0044205]	orotidine-5'-phosphate decarboxylase activity [GO:0004590]	NA
Q1MMJ7	glutamine metabolic process [GO:0006541]	ATP binding [GO:0005524]; GMP synthase (glutamine-hydrolyzing) activity [GO:0003922]; pyrophosphatase activity [GO:0016462]	NA
Q1MMP3	phenylalanyl-tRNA aminoacylation [GO:0006432]	ATP binding [GO:0005524]; magnesium ion binding [GO:0000287]; phenylalanine-tRNA ligase activity [GO:0004826]; tRNA binding [GO:0000049]	cytoplasm [GO:0005737]
Q1MMP4	ribosomal large subunit assembly [GO:0000027]; translation [GO:0006412]	rRNA binding [GO:0019843]; structural constituent of ribosome [GO:0003735]	ribosome [GO:0005840]
Q1MMQ8	positive regulation of translation [GO:0045727]	GTP binding [GO:0005525]; GTPase activity [GO:0003924]; ribosome binding [GO:0043022]; translation elongation factor activity [GO:0003746]	plasma membrane [GO:0005886]
Q1MMY4	gluconeogenesis [GO:0006094]; glycolytic process [GO:0006096]	2,3-bisphosphoglycerate-dependent phosphoglycerate mutase activity [GO:0046538]	NA
Q1MN11	protein folding [GO:0006457]	ATP binding [GO:0005524]; ATP hydrolysis activity [GO:0016887]; unfolded protein binding [GO:0051082]	NA
Q1MN12	DNA replication [GO:0006260]; protein folding [GO:0006457]; response to heat [GO:0009408]	ATP binding [GO:0005524]; heat shock protein binding [GO:0031072]; unfolded protein binding [GO:0051082]; zinc ion binding [GO:0008270]	cytoplasm [GO:0005737]
Q1MN23	CMP-keto-3-deoxy-D-manno-octulosonic acid biosynthetic process [GO:0033468]; lipopolysaccharide biosynthetic process [GO:0009103]	3-deoxy-manno-octulosonate cytidylyltransferase activity [GO:0008690]	cytoplasm [GO:0005737]
Q1MN39	NA	GTP binding [GO:0005525]; GTPase activity [GO:0003924]; translation initiation factor activity [GO:0003743]	cytoplasm [GO:0005737]
Q1MN43	translation [GO:0006412]	rRNA binding [GO:0019843]; structural constituent of ribosome [GO:0003735]	ribosome [GO:0005840]
Q1MNB3	protein unfolding [GO:0043335]	ATP binding [GO:0005524]; ATP hydrolysis activity [GO:0016887]; peptidase activity [GO:0008233]; proteasome-activating activity [GO:0036402]	HslUV protease complex [GO:0009376]
Q1MNB6	histidine biosynthetic process [GO:0000105]	imidazoleglycerol-phosphate dehydratase activity [GO:0004424]	cytoplasm [GO:0005737]
Q1MNC1	histidine biosynthetic process [GO:0000105]	1-(5-phosphoribosyl)-5-[(5-phosphoribosylamino)methylideneamino]imidazole-4-carboxamide isomerase activity [GO:0003949]	cytoplasm [GO:0005737]
Q1MNC6	one-carbon metabolic process [GO:0006730]	adenosylhomocysteinase activity [GO:0004013]	cytoplasm [GO:0005737]
Q1MND4	fatty acid biosynthetic process [GO:0006633]; malonyl-CoA biosynthetic process [GO:2001295]	acetyl-CoA carboxylase activity [GO:0003989]; ATP binding [GO:0005524]; carboxyl- or carbamoyltransferase activity [GO:0016743]	acetyl-CoA carboxylase complex [GO:0009317]
Q1MND5	NA	tryptophan synthase activity [GO:0004834]	NA
Q1MND7	tryptophan biosynthetic process [GO:0000162]	phosphoribosylanthranilate isomerase activity [GO:0004640]	NA
Q1MNF1	protein folding [GO:0006457]; protein tetramerization [GO:0051262]; protein transport [GO:0015031]	unfolded protein binding [GO:0051082]	cytoplasm [GO:0005737]
Q1MNF5	nucleotide metabolic process [GO:0009117]	nucleoside-triphosphate diphosphatase activity [GO:0047429]	cytoplasm [GO:0005737]
Q1MNG0	coenzyme A biosynthetic process [GO:0015937]	ATP binding [GO:0005524]; pantothenate kinase activity [GO:0004594]	cytoplasm [GO:0005737]
Q1MNG2	gluconeogenesis [GO:0006094]	ATP binding [GO:0005524]; metal ion binding [GO:0046872]; phosphoenolpyruvate carboxykinase (ATP) activity [GO:0004612]	cytoplasm [GO:0005737]
Q2JYW6	protein refolding [GO:0042026]	ATP binding [GO:0005524]; ATP hydrolysis activity [GO:0016887]; isomerase activity [GO:0016853]; unfolded protein binding [GO:0051082]	cytoplasm [GO:0005737]
Q2JZH2	protein folding [GO:0006457]	ATP binding [GO:0005524]; ATP hydrolysis activity [GO:0016887]; unfolded protein binding [GO:0051082]	cytoplasm [GO:0005737]
Q2JZQ5	carbohydrate transport [GO:0008643]	NA	periplasmic space [GO:0042597]
Q2JZU1	pantothenate biosynthetic process [GO:0015940]	ATP binding [GO:0005524]; pantoate-beta-alanine ligase activity [GO:0004592]	cytoplasm [GO:0005737]
Q2K2S7	leucyl-tRNA aminoacylation [GO:0006429]	aminoacyl-tRNA editing activity [GO:0002161]; ATP binding [GO:0005524]; leucine-tRNA ligase activity [GO:0004823]	cytoplasm [GO:0005737]
Q2K379	translation [GO:0006412]	structural constituent of ribosome [GO:0003735]	ribosome [GO:0005840]
Q2K386	lysine biosynthetic process via diaminopimelate [GO:0009089]	diaminopimelate epimerase activity [GO:0008837]	cytoplasm [GO:0005737]
Q2K3B1	rRNA base methylation [GO:0070475]	4 iron, 4 sulfur cluster binding [GO:0051539]; metal ion binding [GO:0046872]; rRNA (adenine-C2-)-methyltransferase activity [GO:0070040]; rRNA binding [GO:0019843]; tRNA (adenine-C2-)-methyltransferase activity [GO:0002935]; tRNA binding [GO:0000049]	cytoplasm [GO:0005737]
Q2K3L3	aromatic amino acid family biosynthetic process [GO:0009073]; cellular amino acid biosynthetic process [GO:0008652]; chorismate biosynthetic process [GO:0009423]	3-dehydroquinate synthase activity [GO:0003856]; metal ion binding [GO:0046872]; nucleotide binding [GO:0000166]	cytoplasm [GO:0005737]
Q2K3T1	NA	translation release factor activity, codon specific [GO:0016149]	cytoplasm [GO:0005737]
Q2K4V4	carbohydrate transport [GO:0008643]	ABC-type glycerol-3-phosphate transporter activity [GO:0015430]; ATP binding [GO:0005524]	plasma membrane [GO:0005886]
Q2K5N6	DNA biosynthetic process [GO:0071897]	ATP binding [GO:0005524]; thymidine kinase activity [GO:0004797]; zinc ion binding [GO:0008270]	cytoplasm [GO:0005737]
Q2K5U4	translation [GO:0006412]	5S rRNA binding [GO:0008097]; structural constituent of ribosome [GO:0003735]	ribosome [GO:0005840]
Q2K619	DNA-templated transcription, initiation [GO:0006352]	DNA binding [GO:0003677]; sigma factor activity [GO:0016987]	cytoplasm [GO:0005737]
Q2K7S4	NA	NA	integral component of membrane [GO:0016021]; plasma membrane [GO:0005886]
Q2K814	glycine decarboxylation via glycine cleavage system [GO:0019464]	NA	glycine cleavage complex [GO:0005960]
Q2K827	NA	NA	NA
Q2K869	gluconeogenesis [GO:0006094]; glycolytic process [GO:0006096]	triose-phosphate isomerase activity [GO:0004807]	cytoplasm [GO:0005737]
Q2K8W9	glycolytic process [GO:0006096]	magnesium ion binding [GO:0000287]; phosphopyruvate hydratase activity [GO:0004634]	cell surface [GO:0009986]; extracellular region [GO:0005576]; phosphopyruvate hydratase complex [GO:0000015]
Q2K9D7	GMP salvage [GO:0032263]; purine ribonucleoside salvage [GO:0006166]; XMP salvage [GO:0032265]	guanine phosphoribosyltransferase activity [GO:0052657]; hypoxanthine phosphoribosyltransferase activity [GO:0004422]; magnesium ion binding [GO:0000287]; xanthine phosphoribosyltransferase activity [GO:0000310]	plasma membrane [GO:0005886]
Q2K9J2	transcription, DNA-templated [GO:0006351]	DNA binding [GO:0003677]; DNA-directed 5'-3' RNA polymerase activity [GO:0003899]; protein dimerization activity [GO:0046983]	NA
Q2K9J5	AMP salvage [GO:0044209]	adenylate kinase activity [GO:0004017]; ATP binding [GO:0005524]; zinc ion binding [GO:0008270]	cytoplasm [GO:0005737]
Q2K9K7	translation [GO:0006412]	rRNA binding [GO:0019843]; structural constituent of ribosome [GO:0003735]	ribosome [GO:0005840]
Q2K9L2	translation [GO:0006412]	rRNA binding [GO:0019843]; structural constituent of ribosome [GO:0003735]	small ribosomal subunit [GO:0015935]
Q2K9L4	translation [GO:0006412]	rRNA binding [GO:0019843]; structural constituent of ribosome [GO:0003735]	ribosome [GO:0005840]
Q2K9M8	translation [GO:0006412]	large ribosomal subunit rRNA binding [GO:0070180]; structural constituent of ribosome [GO:0003735]	ribosome [GO:0005840]
Q2K9P5	'de novo' pyrimidine nucleobase biosynthetic process [GO:0006207]; 'de novo' UMP biosynthetic process [GO:0044205]; cellular amino acid metabolic process [GO:0006520]	amino acid binding [GO:0016597]; aspartate carbamoyltransferase activity [GO:0004070]	NA
Q2K9P7	phospholipid biosynthetic process [GO:0008654]	acyl-phosphate glycerol-3-phosphate acyltransferase activity [GO:0043772]	integral component of membrane [GO:0016021]; plasma membrane [GO:0005886]
Q2K9R9	ATP synthesis coupled electron transport [GO:0042773]	NADH dehydrogenase (ubiquinone) activity [GO:0008137]; quinone binding [GO:0048038]	integral component of membrane [GO:0016021]; plasma membrane [GO:0005886]
Q2KA54	nucleotide-excision repair [GO:0006289]; SOS response [GO:0009432]	DNA binding [GO:0003677]; excinuclease ABC activity [GO:0009381]	cytoplasm [GO:0005737]; excinuclease repair complex [GO:0009380]
Q2KA85	NA	ATP binding [GO:0005524]; guanylate kinase activity [GO:0004385]	cytoplasm [GO:0005737]
Q2KB48	hydrogen sulfide biosynthetic process [GO:0070814]; sulfate assimilation [GO:0000103]; sulfate reduction [GO:0019419]	ATP binding [GO:0005524]; sulfate adenylyltransferase (ATP) activity [GO:0004781]	NA
Q2KBV8	NA	proton-transporting ATP synthase activity, rotational mechanism [GO:0046933]	integral component of membrane [GO:0016021]; plasma membrane [GO:0005886]; proton-transporting ATP synthase complex, coupling factor F(o) [GO:0045263]
Q2KBW1	NA	proton-transporting ATP synthase activity, rotational mechanism [GO:0046933]	integral component of membrane [GO:0016021]; plasma membrane [GO:0005886]; proton-transporting ATP synthase complex, coupling factor F(o) [GO:0045263]
Q2KC02	histidine biosynthetic process [GO:0000105]	ATP binding [GO:0005524]; ATP phosphoribosyltransferase activity [GO:0003879]	cytoplasm [GO:0005737]
Q2KCH7	chemotaxis [GO:0006935]; phosphorelay signal transduction system [GO:0000160]	NA	cytoplasm [GO:0005737]
Q2KCN5	NA	ribosome binding [GO:0043022]; rRNA binding [GO:0019843]; translation initiation factor activity [GO:0003743]	cytoplasm [GO:0005737]
Q2KCS8	'de novo' pyrimidine nucleobase biosynthetic process [GO:0006207]; 'de novo' UMP biosynthetic process [GO:0044205]	dihydroorotate dehydrogenase activity [GO:0004152]	cytoplasm [GO:0005737]; plasma membrane [GO:0005886]
Q2KD13	NA	4-hydroxyproline epimerase activity [GO:0047580]	NA
Q2KDK2	translation [GO:0006412]	structural constituent of ribosome [GO:0003735]	ribosome [GO:0005840]
Q2KEA1	protein dephosphorylation [GO:0006470]	ADP binding [GO:0043531]; ATP binding [GO:0005524]; phosphotransferase activity, phosphate group as acceptor [GO:0016776]; protein serine/threonine kinase activity [GO:0004674]	NA
Q52728	poly-hydroxybutyrate biosynthetic process [GO:0042619]	acyltransferase activity [GO:0016746]	cytoplasm [GO:0005737]
Q52741	regulation of transcription, DNA-templated [GO:0006355]	DNA binding [GO:0003677]; zinc ion binding [GO:0008270]	NA
Q52742	NA	NA	NA
Q52784	NA	NA	NA
Q52811	methionine biosynthetic process [GO:0009086]; transsulfuration [GO:0019346]	cystathionine beta-lyase activity [GO:0004121]; cysteine-S-conjugate beta-lyase activity [GO:0047804]; pyridoxal phosphate binding [GO:0030170]	NA
Q52812	amino acid import [GO:0043090]; isoleucine transport [GO:0015818]; L-glutamate import [GO:0051938]; leucine transport [GO:0015820]; valine transport [GO:0015829]	glutamate binding [GO:0016595]; leucine binding [GO:0070728]	ATP-binding cassette (ABC) transporter complex, substrate-binding subunit-containing [GO:0055052]; outer membrane-bounded periplasmic space [GO:0030288]
Q52813	amino acid transport [GO:0006865]	transmembrane transporter activity [GO:0022857]	ATP-binding cassette (ABC) transporter complex [GO:0043190]
Q52814	amino acid transport [GO:0006865]	transmembrane transporter activity [GO:0022857]	ATP-binding cassette (ABC) transporter complex [GO:0043190]
Q52815	NA	ABC-type amino acid transporter activity [GO:0015424]; ATP binding [GO:0005524]	NA
Q52819	cytochrome complex assembly [GO:0017004]; protein-heme linkage [GO:0017003]	heme binding [GO:0020037]; metal ion binding [GO:0046872]	integral component of membrane [GO:0016021]; plasma membrane [GO:0005886]
Q52822	polysaccharide biosynthetic process [GO:0000271]	NA	NA
Q52825	NA	copper ion binding [GO:0005507]; electron transfer activity [GO:0009055]	periplasmic space [GO:0042597]
Q52828	glutathione metabolic process [GO:0006749]	transferase activity [GO:0016740]	NA
Q52866	NA	NA	cell outer membrane [GO:0009279]
Q52894	NA	serine-type endopeptidase activity [GO:0004252]	outer membrane-bounded periplasmic space [GO:0030288]
Q52905	nitrogen fixation [GO:0009399]; regulation of nitrogen utilization [GO:0006808]	enzyme regulator activity [GO:0030234]; nucleotide binding [GO:0000166]	NA
Q52943	NA	structural molecule activity [GO:0005198]	bacterial-type flagellum [GO:0009288]; extracellular region [GO:0005576]
Q52977	nitrogen fixation [GO:0009399]; regulation of transcription, DNA-templated [GO:0006355]	ATP binding [GO:0005524]; hydrolase activity [GO:0016787]; phosphorelay sensor kinase activity [GO:0000155]	cytoplasm [GO:0005737]
Q52989	cellular phosphate ion homeostasis [GO:0030643]; negative regulation of phosphate metabolic process [GO:0045936]; negative regulation of phosphate transmembrane transport [GO:2000186]; phosphate ion transport [GO:0006817]	protein homodimerization activity [GO:0042803]	cytoplasm [GO:0005737]
Q52990	phosphate ion transport [GO:0006817]; regulation of transcription, DNA-templated [GO:0006355]	DNA binding [GO:0003677]; phosphorelay response regulator activity [GO:0000156]	cytoplasm [GO:0005737]
Q52995	fatty acid metabolic process [GO:0006631]	enoyl-CoA hydratase activity [GO:0004300]	NA
Q53210	nitrogen fixation [GO:0009399]	electron transfer activity [GO:0009055]	NA
Q59745	galactose metabolic process [GO:0006012]; polysaccharide biosynthetic process [GO:0000271]	UDP-glucose 4-epimerase activity [GO:0003978]	NA
Q59749	chromosome segregation [GO:0007059]; DNA topological change [GO:0006265]	ATP binding [GO:0005524]; DNA binding [GO:0003677]; DNA topoisomerase type II (double strand cut, ATP-hydrolyzing) activity [GO:0003918]	chromosome [GO:0005694]; extrinsic component of plasma membrane [GO:0019897]
Q59754	pyruvate metabolic process [GO:0006090]	ATP binding [GO:0005524]; kinase activity [GO:0016301]; metal ion binding [GO:0046872]; pyruvate, phosphate dikinase activity [GO:0050242]	NA
Q7CWE8	L-methionine biosynthetic process from homoserine via O-succinyl-L-homoserine and cystathionine [GO:0019281]	homoserine O-acetyltransferase activity [GO:0004414]; homoserine O-succinyltransferase activity [GO:0008899]	cytoplasm [GO:0005737]
Q7CWR3	NA	ATP binding [GO:0005524]; ligase activity [GO:0016874]; metal ion binding [GO:0046872]	NA
Q8RPX8	nitrogen compound metabolic process [GO:0006807]	nickel cation binding [GO:0016151]	cytoplasm [GO:0005737]
Q8U8M6	translation [GO:0006412]	structural constituent of ribosome [GO:0003735]	ribosome [GO:0005840]
Q8U9D9	NA	ATP binding [GO:0005524]; ATP hydrolysis activity [GO:0016887]; magnesium ion binding [GO:0000287]; P-type potassium transmembrane transporter activity [GO:0008556]	integral component of plasma membrane [GO:0005887]
Q8U9L5	cell cycle [GO:0007049]; cell division [GO:0051301]	NA	cell outer membrane [GO:0009279]; integral component of membrane [GO:0016021]
Q8UA56	arginine biosynthetic process [GO:0006526]	acetyl-CoA:L-glutamate N-acetyltransferase activity [GO:0004042]; glutamate N-acetyltransferase activity [GO:0004358]; methione N-acyltransferase activity [GO:0103045]	cytoplasm [GO:0005737]
Q8UAE8	NA	alkanesulfonate monooxygenase activity [GO:0008726]	NA
Q8UB77	D-glucarate catabolic process [GO:0042838]	5-dehydro-4-deoxyglucarate dehydratase activity [GO:0047448]	NA
Q8UCE7	'de novo' IMP biosynthetic process [GO:0006189]	ATP binding [GO:0005524]; phosphoribosylaminoimidazolesuccinocarboxamide synthase activity [GO:0004639]	NA
Q8UD54	queuosine biosynthetic process [GO:0008616]	oxidoreductase activity, acting on other nitrogenous compounds as donors, with NAD or NADP as acceptor [GO:0046857]; preQ1 synthase activity [GO:0033739]	cytoplasm [GO:0005737]
Q8UE17	translation [GO:0006412]	structural constituent of ribosome [GO:0003735]; tRNA binding [GO:0000049]	ribosome [GO:0005840]
Q8UE32	translation [GO:0006412]	rRNA binding [GO:0019843]; structural constituent of ribosome [GO:0003735]	ribosome [GO:0005840]
Q8UE39	translation [GO:0006412]	rRNA binding [GO:0019843]; structural constituent of ribosome [GO:0003735]; tRNA binding [GO:0000049]	ribosome [GO:0005840]
Q8UE93	cell wall organization [GO:0071555]; peptidoglycan biosynthetic process [GO:0009252]; regulation of cell shape [GO:0008360]	glutamate racemase activity [GO:0008881]	NA
Q8UEH1	carbohydrate derivative biosynthetic process [GO:1901137]; carbohydrate metabolic process [GO:0005975]; glutamine metabolic process [GO:0006541]	carbohydrate derivative binding [GO:0097367]; glutamine-fructose-6-phosphate transaminase (isomerizing) activity [GO:0004360]	cytoplasm [GO:0005737]
Q8UEM4	DNA biosynthetic process [GO:0071897]; DNA replication [GO:0006260]	cobalamin binding [GO:0031419]; cobalt ion binding [GO:0050897]; nucleotide binding [GO:0000166]; ribonucleoside-diphosphate reductase activity, thioredoxin disulfide as acceptor [GO:0004748]	NA
Q8UES8	queuosine biosynthetic process [GO:0008616]; tRNA-guanine transglycosylation [GO:0101030]	queuine tRNA-ribosyltransferase activity [GO:0008479]	NA
Q8UF86	nucleotide-excision repair [GO:0006289]; SOS response [GO:0009432]	ATP binding [GO:0005524]; ATP hydrolysis activity [GO:0016887]; DNA binding [GO:0003677]; excinuclease ABC activity [GO:0009381]; zinc ion binding [GO:0008270]	cytoplasm [GO:0005737]; excinuclease repair complex [GO:0009380]
Q8UFA0	dTDP biosynthetic process [GO:0006233]; dTTP biosynthetic process [GO:0006235]	ATP binding [GO:0005524]; thymidylate kinase activity [GO:0004798]	NA
Q8UG70	riboflavin biosynthetic process [GO:0009231]	6,7-dimethyl-8-ribityllumazine synthase activity [GO:0000906]	riboflavin synthase complex [GO:0009349]
Q8UH62	NA	ABC-type sulfate transporter activity [GO:0015419]; ABC-type thiosulfate transporter activity [GO:0102025]; ATP binding [GO:0005524]	ATP-binding cassette (ABC) transporter complex [GO:0043190]
Q8UHE7	RNA processing [GO:0006396]	4 iron, 4 sulfur cluster binding [GO:0051539]; metal ion binding [GO:0046872]; RNA methyltransferase activity [GO:0008173]	NA
Q8UHJ6	isoleucyl-tRNA aminoacylation [GO:0006428]	aminoacyl-tRNA editing activity [GO:0002161]; ATP binding [GO:0005524]; isoleucine-tRNA ligase activity [GO:0004822]; tRNA binding [GO:0000049]	cytoplasm [GO:0005737]
Q8UHN3	'de novo' IMP biosynthetic process [GO:0006189]; purine nucleobase biosynthetic process [GO:0009113]	ATP binding [GO:0005524]; metal ion binding [GO:0046872]; phosphoribosylamine-glycine ligase activity [GO:0004637]	NA
Q8UHX1	histidine biosynthetic process [GO:0000105]	histidinol dehydrogenase activity [GO:0004399]; NAD binding [GO:0051287]; zinc ion binding [GO:0008270]	NA
Q8UI71	arginine biosynthetic process [GO:0006526]	N2-acetyl-L-ornithine:2-oxoglutarate 5-aminotransferase activity [GO:0003992]; pyridoxal phosphate binding [GO:0030170]	cytoplasm [GO:0005737]
Q8UII5	NA	ATP binding [GO:0005524]; glutathione synthase activity [GO:0004363]; metal ion binding [GO:0046872]	NA
Q8UIV8	diaminopimelate biosynthetic process [GO:0019877]; lysine biosynthetic process via diaminopimelate [GO:0009089]	4-hydroxy-tetrahydrodipicolinate reductase [GO:0008839]; NAD binding [GO:0051287]; NADP binding [GO:0050661]; oxidoreductase activity, acting on CH or CH2 groups, NAD or NADP as acceptor [GO:0016726]	cytoplasm [GO:0005737]
Q8UJ19	NA	NA	NA
Q8VRZ3	NA	inorganic diphosphatase activity [GO:0004427]; magnesium ion binding [GO:0000287]; pyrophosphate hydrolysis-driven proton transmembrane transporter activity [GO:0009678]	integral component of plasma membrane [GO:0005887]
Q925W7	translation [GO:0006412]	rRNA binding [GO:0019843]; structural constituent of ribosome [GO:0003735]	ribosome [GO:0005840]
Q92KZ7	carbohydrate transport [GO:0008643]	NA	periplasmic space [GO:0042597]
Q92L73	arginine biosynthetic process [GO:0006526]	argininosuccinate synthase activity [GO:0004055]; ATP binding [GO:0005524]	cytoplasm [GO:0005737]
Q92LB8	translation [GO:0006412]	rRNA binding [GO:0019843]; structural constituent of ribosome [GO:0003735]	ribosome [GO:0005840]
Q92LH1	phosphate-containing compound metabolic process [GO:0006796]	inorganic diphosphatase activity [GO:0004427]; magnesium ion binding [GO:0000287]	cytoplasm [GO:0005737]
Q92M71	inositol phosphate dephosphorylation [GO:0046855]; phosphatidylinositol phosphate biosynthetic process [GO:0046854]	inositol monophosphate 1-phosphatase activity [GO:0008934]; inositol monophosphate 3-phosphatase activity [GO:0052832]; inositol monophosphate 4-phosphatase activity [GO:0052833]; metal ion binding [GO:0046872]	NA
Q92ME3	cell cycle [GO:0007049]; cell division [GO:0051301]; chromosome segregation [GO:0007059]; transposition, DNA-mediated [GO:0006313]	DNA binding [GO:0003677]; tyrosine-based site-specific recombinase activity [GO:0009037]	cytoplasm [GO:0005737]
Q92MK7	protein refolding [GO:0042026]; response to heat [GO:0009408]	ATP binding [GO:0005524]; ATP hydrolysis activity [GO:0016887]	cytoplasm [GO:0005737]
Q92N73	5-phosphoribose 1-diphosphate biosynthetic process [GO:0006015]; nucleotide biosynthetic process [GO:0009165]; ribonucleoside monophosphate biosynthetic process [GO:0009156]	ATP binding [GO:0005524]; kinase activity [GO:0016301]; magnesium ion binding [GO:0000287]; ribose phosphate diphosphokinase activity [GO:0004749]	cytoplasm [GO:0005737]
Q92N95	'de novo' pyrimidine nucleobase biosynthetic process [GO:0006207]; 'de novo' UMP biosynthetic process [GO:0044205]; arginine biosynthetic process [GO:0006526]; glutamine metabolic process [GO:0006541]	ATP binding [GO:0005524]; carbamoyl-phosphate synthase (glutamine-hydrolyzing) activity [GO:0004088]	NA
Q92NL6	cell cycle [GO:0007049]; cell division [GO:0051301]; cell wall organization [GO:0071555]; peptidoglycan biosynthetic process [GO:0009252]; regulation of cell shape [GO:0008360]	ATP binding [GO:0005524]; magnesium ion binding [GO:0000287]; UDP-N-acetylmuramoylalanyl-D-glutamate-2,6-diaminopimelate ligase activity [GO:0008765]	cytoplasm [GO:0005737]
Q92PB6	fumarate metabolic process [GO:0006106]; tricarboxylic acid cycle [GO:0006099]	fumarate hydratase activity [GO:0004333]	tricarboxylic acid cycle enzyme complex [GO:0045239]
Q92PK5	tyrosyl-tRNA aminoacylation [GO:0006437]	ATP binding [GO:0005524]; RNA binding [GO:0003723]; tyrosine-tRNA ligase activity [GO:0004831]	cytoplasm [GO:0005737]
Q92PX0	methionyl-tRNA aminoacylation [GO:0006431]	ATP binding [GO:0005524]; methionine-tRNA ligase activity [GO:0004825]	cytoplasm [GO:0005737]
Q92PZ4	'de novo' UMP biosynthetic process [GO:0044205]; arginine biosynthetic process [GO:0006526]	ATP binding [GO:0005524]; carbamoyl-phosphate synthase (glutamine-hydrolyzing) activity [GO:0004088]; metal ion binding [GO:0046872]	NA
Q92Q37	valyl-tRNA aminoacylation [GO:0006438]	aminoacyl-tRNA editing activity [GO:0002161]; ATP binding [GO:0005524]; valine-tRNA ligase activity [GO:0004832]	cytoplasm [GO:0005737]
Q92Q99	keto-3-deoxy-D-manno-octulosonic acid biosynthetic process [GO:0019294]	3-deoxy-8-phosphooctulonate synthase activity [GO:0008676]	cytoplasm [GO:0005737]
Q92QG5	translation [GO:0006412]	rRNA binding [GO:0019843]; structural constituent of ribosome [GO:0003735]	large ribosomal subunit [GO:0015934]
Q92R46	ribosomal small subunit biogenesis [GO:0042274]	GTP binding [GO:0005525]; GTPase activity [GO:0003924]; small ribosomal subunit rRNA binding [GO:0070181]	cytoplasm [GO:0005737]; plasma membrane [GO:0005886]
Q92RL5	glycyl-tRNA aminoacylation [GO:0006426]	ATP binding [GO:0005524]; glycine-tRNA ligase activity [GO:0004820]	cytoplasm [GO:0005737]
Q92RN8	D-galactonate catabolic process [GO:0034194]	2-dehydro-3-deoxy-6-phosphogalactonate aldolase activity [GO:0008674]	NA
Q92SA6	ATP biosynthetic process [GO:0006754]	identical protein binding [GO:0042802]; polyphosphate kinase activity [GO:0008976]	NA
Q92SK4	nucleotide metabolic process [GO:0009117]; purine nucleoside triphosphate catabolic process [GO:0009146]	dITP diphosphatase activity [GO:0035870]; ITP diphosphatase activity [GO:0036220]; metal ion binding [GO:0046872]; nucleoside-triphosphatase activity [GO:0017111]; nucleotide binding [GO:0000166]; XTP diphosphatase activity [GO:0036222]	NA
Q92SS9	phenylalanyl-tRNA aminoacylation [GO:0006432]	ATP binding [GO:0005524]; magnesium ion binding [GO:0000287]; phenylalanine-tRNA ligase activity [GO:0004826]; tRNA binding [GO:0000049]	cytoplasm [GO:0005737]
Q92SX1	NA	DNA binding [GO:0003677]	bacterial nucleoid [GO:0043590]; cytoplasm [GO:0005737]
Q92T74	carbohydrate metabolic process [GO:0005975]	aldehyde-lyase activity [GO:0016832]	NA
Q92TB1	glutamine metabolic process [GO:0006541]; histidine biosynthetic process [GO:0000105]	glutaminase activity [GO:0004359]; imidazoleglycerol-phosphate synthase activity [GO:0000107]; lyase activity [GO:0016829]	cytoplasm [GO:0005737]
Q92V80	histidine catabolic process to glutamate and formamide [GO:0019556]; histidine catabolic process to glutamate and formate [GO:0019557]	urocanate hydratase activity [GO:0016153]	cytoplasm [GO:0005737]
Q92W56	NA	ABC-type L-arabinose transporter activity [GO:0015612]; ATP binding [GO:0005524]	plasma membrane [GO:0005886]
Q92Y45	cellular protein modification process [GO:0006464]	L-methionine:thioredoxin-disulfide S-oxidoreductase activity [GO:0033744]; peptide-methionine (S)-S-oxide reductase activity [GO:0008113]	NA
Q92ZA4	carbohydrate metabolic process [GO:0005975]	aldehyde-lyase activity [GO:0016832]	NA
Q937W7	glyoxylate cycle [GO:0006097]; tricarboxylic acid cycle [GO:0006099]	malate synthase activity [GO:0004474]; metal ion binding [GO:0046872]	cytoplasm [GO:0005737]
Q93E15	histidine biosynthetic process [GO:0000105]; methionine biosynthetic process [GO:0009086]; purine nucleotide biosynthetic process [GO:0006164]; tetrahydrofolate interconversion [GO:0035999]	methenyltetrahydrofolate cyclohydrolase activity [GO:0004477]; methylenetetrahydrofolate dehydrogenase (NADP+) activity [GO:0004488]	NA
Q9F9B0	carbohydrate transport [GO:0008643]	ATP binding [GO:0005524]	plasma membrane [GO:0005886]
Q9F9K6	translation [GO:0006412]	rRNA binding [GO:0019843]; structural constituent of ribosome [GO:0003735]	ribosome [GO:0005840]
Q9FCP2	polysaccharide biosynthetic process [GO:0000271]	transferase activity [GO:0016740]	NA
Q9KH33	GMP biosynthetic process [GO:0006177]	IMP dehydrogenase activity [GO:0003938]; metal ion binding [GO:0046872]; nucleotide binding [GO:0000166]	NA
Q9L691	protein refolding [GO:0042026]	ATP binding [GO:0005524]; ATP hydrolysis activity [GO:0016887]; isomerase activity [GO:0016853]; unfolded protein binding [GO:0051082]	cytoplasm [GO:0005737]
Q9R9M8	NA	2 iron, 2 sulfur cluster binding [GO:0051537]; DNA binding [GO:0003677]; metal ion binding [GO:0046872]	NA
Q9R9N3	acetyl-CoA biosynthetic process from pyruvate [GO:0006086]; glycolytic process [GO:0006096]	dihydrolipoyllysine-residue acetyltransferase activity [GO:0004742]	pyruvate dehydrogenase complex [GO:0045254]
Q9R9N4	acetyl-CoA biosynthetic process from pyruvate [GO:0006086]; glycolytic process [GO:0006096]	pyruvate dehydrogenase (acetyl-transferring) activity [GO:0004739]	NA
Q9R9N5	acetyl-CoA biosynthetic process from pyruvate [GO:0006086]; glycolytic process [GO:0006096]	pyruvate dehydrogenase (acetyl-transferring) activity [GO:0004739]	intracellular membrane-bounded organelle [GO:0043231]
Q9RAE4	nitrogen compound metabolic process [GO:0006807]; regulation of nitrogen utilization [GO:0006808]	[protein-PII] uridylyltransferase activity [GO:0008773]; phosphoric diester hydrolase activity [GO:0008081]	NA
Q9RAE6	D-alanine catabolic process [GO:0055130]	D-amino-acid dehydrogenase activity [GO:0008718]	NA
Q9S1G2	DNA repair [GO:0006281]; DNA-dependent DNA replication [GO:0006261]	3'-5' exonuclease activity [GO:0008408]; DNA binding [GO:0003677]; DNA-directed DNA polymerase activity [GO:0003887]	NA
Q9X4Y1	carbohydrate transport [GO:0008643]; transmembrane transport [GO:0055085]	NA	ATP-binding cassette (ABC) transporter complex [GO:0043190]; periplasmic space [GO:0042597]
Q9Z3Q1	transposition, DNA-mediated [GO:0006313]	DNA binding [GO:0003677]; transposase activity [GO:0004803]	NA
Q9Z3R3	lipid metabolic process [GO:0006629]	acetoacetate-CoA ligase activity [GO:0030729]; ATP binding [GO:0005524]; metal ion binding [GO:0046872]	NA
Q9Z3R5	carbohydrate transport [GO:0008643]	NA	periplasmic space [GO:0042597]
Q9Z3R8	NA	maltose alpha-glucosidase activity [GO:0032450]	NA
Q9Z3R9	carbohydrate transport [GO:0008643]	ABC-type transporter activity [GO:0140359]; ATP binding [GO:0005524]	plasma membrane [GO:0005886]
Q9Z3S0	D-gluconate catabolic process [GO:0046177]; Entner-Doudoroff pathway through 6-phosphogluconate [GO:0009255]	4 iron, 4 sulfur cluster binding [GO:0051539]; metal ion binding [GO:0046872]; phosphogluconate dehydratase activity [GO:0004456]	NA
Q9Z3S1	carbohydrate metabolic process [GO:0005975]; pentose-phosphate shunt [GO:0006098]	6-phosphogluconolactonase activity [GO:0017057]	NA
Q9Z3S2	glucose metabolic process [GO:0006006]; pentose-phosphate shunt [GO:0006098]	glucose-6-phosphate dehydrogenase activity [GO:0004345]; NADP binding [GO:0050661]	NA

## Sheet: GO Pisum (Fix+)
Supplementary Table 2. The underlying data on annotation of identified proteins with GO terms
UniProt ID	Gene Ontology: Biological process	Gene Ontology: Molecular function	Gene Ontology: Cellular component
O48665	NA	heme binding [GO:0020037]; metal ion binding [GO:0046872]; oxygen binding [GO:0019825]; oxygen carrier activity [GO:0005344]	NA
O48668	NA	heme binding [GO:0020037]; metal ion binding [GO:0046872]; oxygen binding [GO:0019825]; oxygen carrier activity [GO:0005344]	NA
O80405	NA	heme binding [GO:0020037]; metal ion binding [GO:0046872]; oxygen binding [GO:0019825]; oxygen carrier activity [GO:0005344]	NA
P02233	NA	heme binding [GO:0020037]; metal ion binding [GO:0046872]; oxygen binding [GO:0019825]; oxygen carrier activity [GO:0005344]	NA
P02854	NA	nutrient reservoir activity [GO:0045735]	aleurone grain [GO:0033095]; vacuole [GO:0005773]
P02855	NA	nutrient reservoir activity [GO:0045735]	aleurone grain [GO:0033095]; vacuole [GO:0005773]
P02856	NA	nutrient reservoir activity [GO:0045735]	aleurone grain [GO:0033095]; vacuole [GO:0005773]
P02857	NA	nutrient reservoir activity [GO:0045735]	NA
P02867	NA	mannose binding [GO:0005537]; metal ion binding [GO:0046872]	NA
P05493	NA	ATP binding [GO:0005524]; proton-transporting ATP synthase activity, rotational mechanism [GO:0046933]	mitochondrial inner membrane [GO:0005743]; proton-transporting ATP synthase complex, catalytic core F(1) [GO:0045261]
P05692	NA	nutrient reservoir activity [GO:0045735]	NA
P07694	glutamine biosynthetic process [GO:0006542]	ATP binding [GO:0005524]; glutamate-ammonia ligase activity [GO:0004356]	cytoplasm [GO:0005737]
P08282	glutamine biosynthetic process [GO:0006542]	ATP binding [GO:0005524]; glutamate-ammonia ligase activity [GO:0004356]	cytoplasm [GO:0005737]
P08283	nucleosome assembly [GO:0006334]	DNA binding [GO:0003677]	nucleosome [GO:0000786]; nucleus [GO:0005634]
P08688	NA	calcium ion binding [GO:0005509]; nutrient reservoir activity [GO:0045735]	cytosol [GO:0005829]
P09918	fatty acid biosynthetic process [GO:0006633]; oxylipin biosynthetic process [GO:0031408]	linoleate 9S-lipoxygenase activity [GO:1990136]; metal ion binding [GO:0046872]	cytoplasm [GO:0005737]
P13239	abscisic acid-activated signaling pathway [GO:0009738]; defense response [GO:0006952]; response to biotic stimulus [GO:0009607]	abscisic acid binding [GO:0010427]; protein phosphatase inhibitor activity [GO:0004864]; signaling receptor activity [GO:0038023]	NA
P13915	NA	nutrient reservoir activity [GO:0045735]	aleurone grain [GO:0033095]; vacuole [GO:0005773]
P13918	NA	nutrient reservoir activity [GO:0045735]	aleurone grain [GO:0033095]; vacuole [GO:0005773]
P13919	NA	nutrient reservoir activity [GO:0045735]	aleurone grain [GO:0033095]; vacuole [GO:0005773]
P14594	NA	nutrient reservoir activity [GO:0045735]	NA
P15838	NA	nutrient reservoir activity [GO:0045735]	NA
P19251	glutamine metabolic process [GO:0006541]; L-asparagine biosynthetic process [GO:0070981]	asparagine synthase (glutamine-hydrolyzing) activity [GO:0004066]; ATP binding [GO:0005524]	NA
P19252	glutamine metabolic process [GO:0006541]; L-asparagine biosynthetic process [GO:0070981]	asparagine synthase (glutamine-hydrolyzing) activity [GO:0004066]; ATP binding [GO:0005524]	NA
P19975	cellular iron ion homeostasis [GO:0006879]; iron ion transport [GO:0006826]	ferric iron binding [GO:0008199]; ferroxidase activity [GO:0004322]	chloroplast [GO:0009507]
P25470	NA	DNA binding [GO:0003677]; protein heterodimerization activity [GO:0046982]	nucleosome [GO:0000786]; nucleus [GO:0005634]
P25890	hydrogen peroxide catabolic process [GO:0042744]; response to oxidative stress [GO:0006979]	catalase activity [GO:0004096]; heme binding [GO:0020037]; metal ion binding [GO:0046872]	peroxisome [GO:0005777]
P27084	NA	metal ion binding [GO:0046872]; superoxide dismutase activity [GO:0004784]	mitochondrial matrix [GO:0005759]
P29502	microtubule-based process [GO:0007017]	GTP binding [GO:0005525]; GTPase activity [GO:0003924]; structural constituent of cytoskeleton [GO:0005200]	cytoplasm [GO:0005737]; microtubule [GO:0005874]
P30124	chlorophyll biosynthetic process [GO:0015995]; protoporphyrinogen IX biosynthetic process [GO:0006782]	metal ion binding [GO:0046872]; porphobilinogen synthase activity [GO:0004655]	chloroplast [GO:0009507]
P30707	translation [GO:0006412]	rRNA binding [GO:0019843]; structural constituent of ribosome [GO:0003735]	ribosome [GO:0005840]
P34899	glycine biosynthetic process from serine [GO:0019264]; tetrahydrofolate interconversion [GO:0035999]	glycine hydroxymethyltransferase activity [GO:0004372]; pyridoxal phosphate binding [GO:0030170]	mitochondrion [GO:0005739]
P34922	glucose metabolic process [GO:0006006]; glycolytic process [GO:0006096]	glyceraldehyde-3-phosphate dehydrogenase (NAD+) (phosphorylating) activity [GO:0004365]; NAD binding [GO:0051287]; NADP binding [GO:0050661]	cytoplasm [GO:0005737]
P40590	translation [GO:0006412]	structural constituent of ribosome [GO:0003735]	ribosome [GO:0005840]
P46256	glycolytic process [GO:0006096]	fructose-bisphosphate aldolase activity [GO:0004332]	cytoplasm [GO:0005737]
P46257	glycolytic process [GO:0006096]	fructose-bisphosphate aldolase activity [GO:0004332]	cytoplasm [GO:0005737]
P46266	NA	NA	NA
P46298	translation [GO:0006412]	structural constituent of ribosome [GO:0003735]	ribosome [GO:0005840]
P48534	cellular response to oxidative stress [GO:0034599]; hydrogen peroxide catabolic process [GO:0042744]	heme binding [GO:0020037]; L-ascorbate peroxidase activity [GO:0016688]; metal ion binding [GO:0046872]	cytoplasm [GO:0005737]
P51062	carbon fixation [GO:0015977]; photosynthesis [GO:0015979]; tricarboxylic acid cycle [GO:0006099]	phosphoenolpyruvate carboxylase activity [GO:0008964]	cytoplasm [GO:0005737]
P51850	NA	magnesium ion binding [GO:0000287]; pyruvate decarboxylase activity [GO:0004737]; thiamine pyrophosphate binding [GO:0030976]	NA
P51851	NA	magnesium ion binding [GO:0000287]; pyruvate decarboxylase activity [GO:0004737]; thiamine pyrophosphate binding [GO:0030976]	NA
P52902	acetyl-CoA biosynthetic process from pyruvate [GO:0006086]; glycolytic process [GO:0006096]	pyruvate dehydrogenase (acetyl-transferring) activity [GO:0004739]	mitochondrial matrix [GO:0005759]
P52904	acetyl-CoA biosynthetic process from pyruvate [GO:0006086]; glycolytic process [GO:0006096]	pyruvate dehydrogenase (acetyl-transferring) activity [GO:0004739]	mitochondrial matrix [GO:0005759]
P55844	translation [GO:0006412]	RNA binding [GO:0003723]; structural constituent of ribosome [GO:0003735]	ribosome [GO:0005840]
P62788	NA	DNA binding [GO:0003677]; protein heterodimerization activity [GO:0046982]	nucleosome [GO:0000786]; nucleus [GO:0005634]
P62929	NA	nutrient reservoir activity [GO:0045735]; toxin activity [GO:0090729]	NA
P68427	NA	DNA binding [GO:0003677]; protein heterodimerization activity [GO:0046982]	nucleosome [GO:0000786]; nucleus [GO:0005634]
P69322	NA	NA	cytoplasm [GO:0005737]; nucleus [GO:0005634]
Q03943	NA	NA	chloroplast inner membrane [GO:0009706]; chloroplast thylakoid membrane [GO:0009535]
Q05462	translation [GO:0006412]	structural constituent of ribosome [GO:0003735]	ribosome [GO:0005840]
Q40987	biological process involved in symbiotic interaction [GO:0044403]	carbohydrate binding [GO:0030246]	peribacteroid fluid [GO:0043662]; peribacteroid membrane [GO:0043661]
Q41011	NA	GTP binding [GO:0005525]; GTPase activity [GO:0003924]; translation elongation factor activity [GO:0003746]	cytoplasm [GO:0005737]
Q43068	NA	heme binding [GO:0020037]; iron ion binding [GO:0005506]; monooxygenase activity [GO:0004497]; oxidoreductase activity, acting on paired donors, with incorporation or reduction of molecular oxygen [GO:0016705]	membrane [GO:0016020]
Q43077	amine metabolic process [GO:0009308]; cellular response to azide [GO:0097185]	aliphatic-amine oxidase activity [GO:0052595]; aminoacetone:oxygen oxidoreductase(deaminating) activity [GO:0052594]; copper ion binding [GO:0005507]; diamine oxidase activity [GO:0052597]; phenethylamine:oxygen oxidoreductase (deaminating) activity [GO:0052596]; primary amine oxidase activity [GO:0008131]; quinone binding [GO:0048038]; tryptamine:oxygen oxidoreductase (deaminating) activity [GO:…	NA
Q43092	starch biosynthetic process [GO:0019252]	ADP-glucose-starch glucosyltransferase activity [GO:0102502]; glycogen (starch) synthase activity [GO:0004373]	amyloplast [GO:0009501]; chloroplast [GO:0009507]
Q43093	starch biosynthetic process [GO:0019252]	alpha-1,4-glucan synthase activity [GO:0033201]; glycogen (starch) synthase activity [GO:0004373]; starch synthase activity [GO:0009011]	amyloplast [GO:0009501]; chloroplast [GO:0009507]
Q5GQ66	response to oxidative stress [GO:0006979]	dioxygenase activity [GO:0051213]; heme binding [GO:0020037]; peroxidase activity [GO:0004601]	NA
Q8VWZ1	NA	1-pyrroline dehydrogenase activity [GO:0033737]; aminobutyraldehyde dehydrogenase activity [GO:0019145]; nucleotide binding [GO:0000166]	NA
Q99285	chromosome condensation [GO:0030261]	DNA binding [GO:0003677]; protein heterodimerization activity [GO:0046982]	nucleosome [GO:0000786]; nucleus [GO:0005634]
Q9S8P4	NA	manganese ion binding [GO:0030145]	apoplast [GO:0048046]
Q9SAZ0	NA	heme binding [GO:0020037]; metal ion binding [GO:0046872]; oxygen binding [GO:0019825]; oxygen carrier activity [GO:0005344]	NA
Q9SAZ1	NA	heme binding [GO:0020037]; metal ion binding [GO:0046872]; oxygen binding [GO:0019825]; oxygen carrier activity [GO:0005344]	NA

## Sheet: GO Pisum (Fix-)
Supplementary Table 2. The underlying data on annotation of identified proteins with GO terms
UniProt ID	Gene Ontology: Biological process	Gene Ontology: Molecular function	Gene Ontology: Cellular component
O48665	NA	heme binding [GO:0020037]; metal ion binding [GO:0046872]; oxygen binding [GO:0019825]; oxygen carrier activity [GO:0005344]	NA
O48668	NA	heme binding [GO:0020037]; metal ion binding [GO:0046872]; oxygen binding [GO:0019825]; oxygen carrier activity [GO:0005344]	NA
O82709	protein folding [GO:0006457]	calcium ion binding [GO:0005509]; carbohydrate binding [GO:0030246]; unfolded protein binding [GO:0051082]	endoplasmic reticulum membrane [GO:0005789]; integral component of membrane [GO:0016021]
P05493	NA	ATP binding [GO:0005524]; proton-transporting ATP synthase activity, rotational mechanism [GO:0046933]	mitochondrial inner membrane [GO:0005743]; proton-transporting ATP synthase complex, catalytic core F(1) [GO:0045261]
P08282	glutamine biosynthetic process [GO:0006542]	ATP binding [GO:0005524]; glutamate-ammonia ligase activity [GO:0004356]	cytoplasm [GO:0005737]
P08283	nucleosome assembly [GO:0006334]	DNA binding [GO:0003677]	nucleosome [GO:0000786]; nucleus [GO:0005634]
P13239	abscisic acid-activated signaling pathway [GO:0009738]; defense response [GO:0006952]; response to biotic stimulus [GO:0009607]	abscisic acid binding [GO:0010427]; protein phosphatase inhibitor activity [GO:0004864]; signaling receptor activity [GO:0038023]	NA
P13915	NA	nutrient reservoir activity [GO:0045735]	aleurone grain [GO:0033095]; vacuole [GO:0005773]
P19251	glutamine metabolic process [GO:0006541]; L-asparagine biosynthetic process [GO:0070981]	asparagine synthase (glutamine-hydrolyzing) activity [GO:0004066]; ATP binding [GO:0005524]	NA
P19975	cellular iron ion homeostasis [GO:0006879]; iron ion transport [GO:0006826]	ferric iron binding [GO:0008199]; ferroxidase activity [GO:0004322]	chloroplast [GO:0009507]
P21226	cell wall macromolecule catabolic process [GO:0016998]; chitin catabolic process [GO:0006032]; defense response [GO:0006952]; polysaccharide catabolic process [GO:0000272]	chitin binding [GO:0008061]; chitinase activity [GO:0004568]	NA
P25890	hydrogen peroxide catabolic process [GO:0042744]; response to oxidative stress [GO:0006979]	catalase activity [GO:0004096]; heme binding [GO:0020037]; metal ion binding [GO:0046872]	peroxisome [GO:0005777]
P26969	glycine catabolic process [GO:0006546]	glycine dehydrogenase (decarboxylating) activity [GO:0004375]	glycine cleavage complex [GO:0005960]; mitochondrion [GO:0005739]
P29502	microtubule-based process [GO:0007017]	GTP binding [GO:0005525]; GTPase activity [GO:0003924]; structural constituent of cytoskeleton [GO:0005200]	cytoplasm [GO:0005737]; microtubule [GO:0005874]
P30707	translation [GO:0006412]	rRNA binding [GO:0019843]; structural constituent of ribosome [GO:0003735]	ribosome [GO:0005840]
P34922	glucose metabolic process [GO:0006006]; glycolytic process [GO:0006096]	glyceraldehyde-3-phosphate dehydrogenase (NAD+) (phosphorylating) activity [GO:0004365]; NAD binding [GO:0051287]; NADP binding [GO:0050661]	cytoplasm [GO:0005737]
P40590	translation [GO:0006412]	structural constituent of ribosome [GO:0003735]	ribosome [GO:0005840]
P46256	glycolytic process [GO:0006096]	fructose-bisphosphate aldolase activity [GO:0004332]	cytoplasm [GO:0005737]
P46257	glycolytic process [GO:0006096]	fructose-bisphosphate aldolase activity [GO:0004332]	cytoplasm [GO:0005737]
P46298	translation [GO:0006412]	structural constituent of ribosome [GO:0003735]	ribosome [GO:0005840]
P48534	cellular response to oxidative stress [GO:0034599]; hydrogen peroxide catabolic process [GO:0042744]	heme binding [GO:0020037]; L-ascorbate peroxidase activity [GO:0016688]; metal ion binding [GO:0046872]	cytoplasm [GO:0005737]
P51850	NA	magnesium ion binding [GO:0000287]; pyruvate decarboxylase activity [GO:0004737]; thiamine pyrophosphate binding [GO:0030976]	NA
P51851	NA	magnesium ion binding [GO:0000287]; pyruvate decarboxylase activity [GO:0004737]; thiamine pyrophosphate binding [GO:0030976]	NA
P52904	acetyl-CoA biosynthetic process from pyruvate [GO:0006086]; glycolytic process [GO:0006096]	pyruvate dehydrogenase (acetyl-transferring) activity [GO:0004739]	mitochondrial matrix [GO:0005759]
P55844	translation [GO:0006412]	RNA binding [GO:0003723]; structural constituent of ribosome [GO:0003735]	ribosome [GO:0005840]
P62788	NA	DNA binding [GO:0003677]; protein heterodimerization activity [GO:0046982]	nucleosome [GO:0000786]; nucleus [GO:0005634]
P68427	NA	DNA binding [GO:0003677]; protein heterodimerization activity [GO:0046982]	nucleosome [GO:0000786]; nucleus [GO:0005634]
P69322	NA	NA	cytoplasm [GO:0005737]; nucleus [GO:0005634]
P93472	NA	calmodulin binding [GO:0005516]; delta24-sterol reductase activity [GO:0050614]; FAD binding [GO:0071949]	integral component of membrane [GO:0016021]
Q03943	NA	NA	chloroplast inner membrane [GO:0009706]; chloroplast thylakoid membrane [GO:0009535]
Q05462	translation [GO:0006412]	structural constituent of ribosome [GO:0003735]	ribosome [GO:0005840]
Q06931	abscisic acid-activated signaling pathway [GO:0009738]; defense response [GO:0006952]; response to biotic stimulus [GO:0009607]	abscisic acid binding [GO:0010427]; protein phosphatase inhibitor activity [GO:0004864]; signaling receptor activity [GO:0038023]	NA
Q40987	biological process involved in symbiotic interaction [GO:0044403]	carbohydrate binding [GO:0030246]	peribacteroid fluid [GO:0043662]; peribacteroid membrane [GO:0043661]
Q41008	fatty acid biosynthetic process [GO:0006633]; malonyl-CoA biosynthetic process [GO:2001295]	acetyl-CoA carboxylase activity [GO:0003989]; ATP binding [GO:0005524]; transferase activity [GO:0016740]	acetyl-CoA carboxylase complex [GO:0009317]; chloroplast inner membrane [GO:0009706]
Q43068	NA	heme binding [GO:0020037]; iron ion binding [GO:0005506]; monooxygenase activity [GO:0004497]; oxidoreductase activity, acting on paired donors, with incorporation or reduction of molecular oxygen [GO:0016705]	membrane [GO:0016020]
Q43077	amine metabolic process [GO:0009308]; cellular response to azide [GO:0097185]	aliphatic-amine oxidase activity [GO:0052595]; aminoacetone:oxygen oxidoreductase(deaminating) activity [GO:0052594]; copper ion binding [GO:0005507]; diamine oxidase activity [GO:0052597]; phenethylamine:oxygen oxidoreductase (deaminating) activity [GO:0052596]; primary amine oxidase activity [GO:0008131]; quinone binding [GO:0048038]; tryptamine:oxygen oxidoreductase (deaminating) activity [GO:…	NA
Q43092	starch biosynthetic process [GO:0019252]	ADP-glucose-starch glucosyltransferase activity [GO:0102502]; glycogen (starch) synthase activity [GO:0004373]	amyloplast [GO:0009501]; chloroplast [GO:0009507]
Q43093	starch biosynthetic process [GO:0019252]	alpha-1,4-glucan synthase activity [GO:0033201]; glycogen (starch) synthase activity [GO:0004373]; starch synthase activity [GO:0009011]	amyloplast [GO:0009501]; chloroplast [GO:0009507]
Q5GQ66	response to oxidative stress [GO:0006979]	dioxygenase activity [GO:0051213]; heme binding [GO:0020037]; peroxidase activity [GO:0004601]	NA
Q8VWZ1	NA	1-pyrroline dehydrogenase activity [GO:0033737]; aminobutyraldehyde dehydrogenase activity [GO:0019145]; nucleotide binding [GO:0000166]	NA
Q99285	chromosome condensation [GO:0030261]	DNA binding [GO:0003677]; protein heterodimerization activity [GO:0046982]	nucleosome [GO:0000786]; nucleus [GO:0005634]
Q9S8P4	NA	manganese ion binding [GO:0030145]	apoplast [GO:0048046]
